# Supplementary material for: Concomitant preterm birth and severe small-for-gestational age birth weight among infants of immigrant mothers in Ontario originating from the Philippines and East Asia: a population-based study
Source: PubMed Central journal article supplement — BMJ Open. 2017 Jul 18;7(7):e015386. doi: 10.1136/bmjopen-2016-015386 (PMC5734583; doi:10.1136/bmjopen-2016-015386), 2017-07-18
Supplement: bmjopen-2016-015386.draft_revisions.pdf [file bmjopen-2016-015386.draft_revisions.pdf]

# BMJ Open

## Preterm birth and severe small-for-gestational age birthweight among infants of mothers from the Philippines

|                                 |                                                                                                                                                                                                                                                                                                       |
|---------------------------------|-------------------------------------------------------------------------------------------------------------------------------------------------------------------------------------------------------------------------------------------------------------------------------------------------------|
| Journal:                        | <i>BMJ Open</i>                                                                                                                                                                                                                                                                                       |
| Manuscript ID                   | bmjopen-2016-015386                                                                                                                                                                                                                                                                                   |
| Article Type:                   | Research                                                                                                                                                                                                                                                                                              |
| Date Submitted by the Author:   | 01-Dec-2016                                                                                                                                                                                                                                                                                           |
| Complete List of Authors:       | Bartsch, Emily; St. Michael's Hospital, Li Ka Shing Knowledge Institute Park, Alston<br>Jairam, Jennifer; St. Michael's Hospital, University of Toronto, Medicine, and Obstetrics and Gynecology<br>Ray, Joel; St. Michael's Hospital, University of Toronto, Medicine, and Obstetrics and Gynecology |
| <b>Primary Subject Heading</b>: | Obstetrics and gynaecology                                                                                                                                                                                                                                                                            |
| Secondary Subject Heading:      | Paediatrics                                                                                                                                                                                                                                                                                           |
| Keywords:                       | OBSTETRICS, Ethnicity, Preterm birth                                                                                                                                                                                                                                                                  |
|                                 |                                                                                                                                                                                                                                                                                                       |

SCHOLARONE™  
Manuscripts

1  
2  
3 Preterm birth and severe small-for-gestational age birthweight  
4 among infants of mothers from the Philippines  
5  
6

7 Emily Bartsch, BMSc  
8 University of Toronto  
9 Toronto, Ontario, Canada  
10

11 Alison L. Park, MSc  
12 Institute for Clinical Evaluative Sciences  
13 Toronto, Ontario, Canada  
14

15 Jennifer Jairam, MSc PhD(c)  
16 University of Toronto  
17 Toronto, Ontario, Canada  
18

19 Joel G. Ray, MD MSc  
20 Departments of Medicine, Health Policy Management and Evaluation,  
21 and Obstetrics and Gynecology  
22 St. Michael's Hospital, University of Toronto  
23 Toronto, Ontario, Canada  
24  
25  
26  
27  
28  
29  
30  
31

32 **Corresponding author:**

33 Joel G Ray  
34 Department of Medicine, St. Michael's Hospital  
35 30 Bond Street  
36 Toronto, Ontario  
37 M5B 1W8  
38 Tel: (416) 864-6060, Ext 77442  
39 Fax : (416) 864-5485  
40 e-mail: rayj@smh.ca  
41  
42  
43  
44  
45  
46  
47  
48  
49  
50  
51  
52  
53  
54

55 **Text word count:** 1540

56 **Abstract word count:** 246  
57  
58  
59  
60

## Abstract

**Objectives:** Women from the Philippines form one of the largest immigrant groups to North America. Their newborns experience higher rates of preterm birth (PTB), and separately, small-for-gestational age (SGA) birthweight, compared to other East Asians. It is not known if Filipina women are at elevated risk of concomitant PTB and severe SGA (PTB-SGA), a pathological state likely reflective of placental dysfunction and neonatal morbidity.

**Methods:** We conducted a population-based study of all singleton or twin livebirths in Ontario, from 2002 to 2011, among immigrant mothers from the Philippines (N = 27,946), Vietnam (N = 15,297), Hong Kong (N = 5618), South Korea (N = 5148) and China (N = 42,517). We used modified Poisson regression to generate relative risks (RR) of PTB-SGA, defined as a birth < 37 weeks' gestation and a birthweight < 5<sup>th</sup> percentile. RRs were adjusted for maternal age, parity, marital status, income quintile, infant sex and twin births.

**Results:** Relative to mothers from China (2.3 per 1000), the rate of PTB-SGA was significantly higher among infants of mothers from the Philippines (6.5 per 1000; RR 2.91, 95% CI 2.27-3.73), and those from Vietnam (3.7 per 1000; RR 1.68, 95% CI 1.21-2.34). The RR of PTB-SGA was not higher for infants of mothers from Hong Kong or South Korea.

**Interpretation:** Among infants born to immigrant women from five East Asian countries, the risk of PTB-SGA was highest among those from the Philippines. These women and their fetuses may require additional monitoring and interventions.

**Keywords:** Preterm birth; small for gestational age birthweight; ethnicity; race; immigrant; East Asia; Philippines; Filipina; Viet Nam.

**Article summary: Strengths and limitations of this study**

- We conducted a population-based study of all livebirths in Ontario, comparing immigrant mothers from the Philippines (N = 27,946), Vietnam (N = 15,297), Hong Kong (N = 5618), South Korea (N = 5148) to those from China (N = 42,517).
- The rate of PTB-SGA was highest among infants of mothers from the Philippines (6.5 per 1000), which was 2.91 (95% confidence interval [CI] 2.27-3.73) times higher than women from China.
- Among infants born to immigrant women from five East Asian countries, the risk of PTB-SGA was highest among those from the Philippines. These women and their fetuses may require additional monitoring and interventions.
- We excluded stillbirths, who are potentially the most pathological group of fetuses, and who are at risk of PTB-SGA.
- We lacked data on skillset and level of education at immigration, immigration class, and duration of residence at the time of the index birth. We also did not possess information on parental height or weight.

## Background

A pregnancy resulting in a preterm birth (PTB) and concomitant small for gestational age birthweight (SGA) – “PTB-SGA” – is thought to be most pathological, in terms of both being due to placental dysfunction(1, 2) and their adverse sequelae for the newborn infant(3, 4). Relative to infants born either PTB alone or SGA alone, those affected by PTB-SGA are 15 times more likely to die in the first month of life(3).

PTB(5) and SGA(6) are each more frequent in women from the Philippines. Chronic hypertension(7) and preterm onset of preeclampsia(8) are each risk factors for provider-initiated (“iatrogenic”) PTB and SGA, and they are significantly more likely to present in Filipina women than Caucasian or other East Asian women. What remains unknown is whether the risk of PTB-SGA is higher among Filipina women than their counterparts from other East Asian countries.

Herein, we performed a study in Ontario, Canada, where foreign-born individuals comprise 20% of the population and nearly 35% of all births, the highest proportion of G8 countries.(9) We compared the risk of PTB-SGA among five East Asian groups, using a < 5<sup>th</sup> percentile cut-point to define severe SGA, which is more predictive of adverse perinatal outcomes than a < 10<sup>th</sup> percentile cut-point(10).

## Methods

### *Study sample*

This population-based study comprised all live singletons and twin births in Ontario between 2002 and 2011. Data were retrieved from livebirth records provided by Vital Statistics. We excluded stillbirths, as information on parental country of origin is missing for 12% of records(11). As all records were de-identified, a given woman may have contributed more than one birth during the study period, but we adjusted for parity, as described below. All pregnancy and newborn care is universally covered under Ontario’s Health Insurance Plan. Approximately 95% of Ontarian women undergo prenatal ultrasonography before 20 weeks gestation, enhancing accuracy of gestational age determined at birth.(12)

### *Exposures and outcomes*

The main exposure was maternal country of birth, which was self-reported on the infant's birth record. Each newborn was then assigned to one of five maternal East Asian countries of origin: (1) China (the referent), (2) Hong Kong, (3) South Korea, (4) Vietnam, and (5) the Philippines. Women from China were chosen as the reference group as they are the largest East Asian immigrant group in Ontario(9), and are have relatively lower rates of PTB and SGA(5, 6). The main study outcome was PTB-SGA, defined as PTB < 37 weeks and severe SGA < 5<sup>th</sup> percentile(10). The birthweight percentile curves used herein were those for all livebirths in Ontario, and were not otherwise customized by maternal ethnicity or other factors (6,11). Reasons for the latter were that we restricted our cohort solely to births of East Asian mothers, and that defining severe SGA at < 5<sup>th</sup> percentile is a cut-point that reflects pathological intrauterine growth restriction (10). Secondary outcomes were PTB without severe SGA, and severe SGA without PTB.

### *Data analysis*

We used modified Poisson regression models to estimate relative risks (RR) and 95% confidence intervals (CI) for each study outcome in association with maternal country of origin. RR were adjusted for maternal age (< 20, 20–34, ≥ 35 years), parity (0, 1, 2, 3, ≥ 4), marital status (married/common-law, unmarried, unknown), residential income quintile (Q1 [lowest] to Q5 [highest], unknown)(13), infant sex, and twin births.

For the main outcome of PTB-SGA, we additionally performed stratified analyses to examine potential effect measure modification by parity (nulliparous vs. parous) and by maternal age (< 35 years vs. ≥ 35 years).

As the study focus was to compare immigrants from different East Asian countries, Canadian-born mothers were not included in regression models. However, for comparative purposes, we describe herein the characteristics of Canadian-born mothers and their infants.

Statistical analyses were performed using SAS 9.4 (SAS Institute Inc., Cary NC). Ethics approval was provided by the Research Ethics Board of St. Michael's Hospital, Toronto, Ontario.

## Results

Between 2002 and 2011, there were 956,994 liveborn singleton or twin births in Ontario to mothers born in Canada, China, Hong Kong, South Korea, Vietnam or the Philippines. We excluded 893 infants (0.09%) whose gestational age was < 24 or > 42 weeks, and 487 infants (0.05%) whose gestational age at birth was unknown. We further excluded infants whose birthweight was unknown (n = 31) or < 500 g (n = 55), whose sex was unknown (n = 1), or in which maternal age (n = 108) or parity (n = 239) were unknown.

The final cohort comprised 42,517 births to mothers from China, 5,618 from Hong Kong, 5,148 from South Korea, 15,297 from Vietnam, and 27,946 from the Philippines. The remainder were newborns of mothers from Canada (Table 1). In general, mothers from East Asian countries tended to be older than Canadian-born women, but of similar parity. Filipina-born mothers were similar in age, marital status and income to Chinese-born mothers (Table 1).

Compared to mothers from China, the outcomes of PTB without severe SGA, and severe SGA without PTB, were significantly more prevalent among newborns of mothers from Hong Kong, Vietnam and the Philippines, but not South Korea (Figure 1). The more severe outcome of PTB-SGA was significantly more common among newborns of mothers from Vietnam (3.7 per 1000; aRR 1.68 95% CI 1.21 to 2.34), compared to those of mothers from China (2.3 per 1000). For newborns of Filipina women, the rate (6.5 per 1000) and aRR (2.91, 95% CI 2.27 to 3.73) were even higher.

In our stratified analyses, the risk of PTB-SGA was somewhat more pronounced among Filipina women aged  $\geq 35$  years or older (Figure 2, upper) and those who were nulliparous (Figure 2, lower).

Finally, limiting the dataset to singleton births did not appreciably change the RR of PTB-SGA, even heightening the RR among Filipina women (Supplementary file 1).

## Interpretation

Newborns of mothers from the Philippines were most vulnerable to PTB-SGA, especially among women  $\geq 35$  years, who comprised 37% of all Filipina mothers, and in whom the rate of PTB-SGA was nearly 1%.

### *Strengths and limitations*

We evaluated nearly 100,000 livebirths among women born in five East Asian countries, which are major sources of immigrants to Ontario, in a setting of universal healthcare. Infants of Chinese-born women provided an ideal reference group, as China is the largest source of immigrants from East Asia to Ontario, and they have a low incidence of adverse neonatal and maternal outcomes(5, 14). The < 5<sup>th</sup> percentile cut-off used to define severe SGA reflects a degree of smallness that is more likely to be pathological, rather than constitutional(10). Still, the outcome of PTB-SGA was not rare – occurring in 6.5 per 1000 infants of Filipina mothers. We were able to account for some previously noted risk factors for PTB or SGA, such as maternal age, infant sex, parity, income level and marital status.

A limitation of this study was the exclusion of stillbirths, who are potentially the most pathological group of fetuses, and who are at risk of PTB-SGA(15, 16). We lacked data on factors associated with the so-called “healthy immigrant effect”(17), such as skillset and level of education at immigration, immigration class, and duration of residence at the time of the index birth. We also did not possess information on parental height or weight – which may influence newborn weight – or conditions such as maternal chronic hypertension and diabetes mellitus, or maternal behavioural risk factors (e.g. smoking, drug/substance abuse).

### *Implications*

In 2011, 13.1% of all newcomers to Canada were from the Philippines(9). Women from the Philippines were at exceptionally high risk of PTB-SGA, peaking at nearly 1% among those aged 35 years and older, and who represent one-third of all Filipina women giving birth in Ontario. From a public health perspective, there is value in reducing the incidence of PTB-SGA, and such a strategy might start with Filipina women. For healthcare providers – including family doctors, obstetricians, or midwives – the priority would be to address risk factors in these women. This can be done at several time points – before becoming pregnant, during pregnancy, and at the time of delivery. Before pregnancy, providers can counsel Filipina women, especially those women older than 35 years of age, on the possibility of adverse perinatal outcomes. During the pregnancy, risk factors can be identified and managed. Chronic hypertension is one important



1  
2  
3 risk factor for both PTB(18) and SGA(19, 20), and also for preeclampsia(21), which can give rise  
4 to PTB-SGA(22). Chronic hypertension is highly prevalent among Filipina women in Ontario(7);  
5 therefore, efforts to regulate blood pressure and prevent preeclampsia may help reduce the  
6 risk of SGA-PTB among Filipina women, and also those from Vietnam. Such interventions  
7 include aspirin(23-25) and early pregnancy blood pressure assessments(26). By the third  
8 trimester of pregnancy, periodic sonographic assessment of fetal growth and well-being should  
9 be considered, as there is evidence that this helps the clinician balance the risks of prematurity  
10 against a worsening intrauterine environment(27).  
11  
12  
13  
14  
15  
16  
17  
18  
19

## 20 **Conclusions**

21 What differentiates a Filipina woman from another East Asian woman is her heightened risk  
22 of having a liveborn affected by PTB-SGA, a severe pathological state. For Filipina immigrant  
23 women, appropriate cautionary measures should be taken to ensure that mother and baby  
24 remain healthy throughout the pregnancy and delivery. Future research should aim to identify  
25 specific, and ideally modifiable, traits of Filipina women that increase the risk of PTB-SGA during  
26 pregnancy.  
27  
28  
29  
30  
31  
32  
33  
34

35 **Authors contributions:** Bartsch contributed to the study concept, analysis and interpretation of  
36 the data, drafting of manuscript, manuscript revision and approval of final version. Ray  
37 contributed to the study concept, analysis and interpretation of the data, drafting of  
38 manuscript, manuscript revision, and approval of final version. Park contributed to the analysis  
39 and interpretation of the data, drafting of manuscript, manuscript revision, and approval of  
40 final version. Jairam contributed to the interpretation of the data and approval of final version.  
41  
42  
43  
44  
45  
46  
47  
48

49 **Data sharing statement:** No additional data available.  
50  
51

52 **Details of ethics approval:** Ethics approval was granted by the Research Ethics Board of St.  
53 Michael's Hospital in Toronto, Ontario, Canada.  
54  
55  
56  
57  
58  
59  
60

1  
2  
3  
4 **Funding statement:** This work was supported by a grant from the Canadian Institutes of Health  
5 Research (CIHR). JGR holds a Canadian Institutes for Health Research Chair in Reproductive and  
6 Child Health Services and Policy Research, co-funded by the SickKids Foundation.  
7  
8  
9

10  
11 **Competing interests:** None.  
12  
13

#### 14 **FIGURE LEGENDS**

15  
16  
17  
18 **Figure 1. Rate and crude (red circles) and adjusted (black squares) relative risk of preterm**  
19 **birth (PTB) without severe small for gestational age (SGA [upper]), SGA without PTB (middle),**  
20 **and PTB with SGA (PTB-SGA [lower]) for liveborn infants of East Asian-born mothers.** Relative  
21 risks were adjusted for maternal age (< 20, 20–34, ≥ 35 years), parity (0, 1, 2, 3, ≥ 4), marital  
22 status (married/common-law, unmarried, unknown), residential income quintile (Q1 [lowest] to  
23 Q5 [highest], unknown), infant sex, and twin birth.  
24  
25  
26  
27  
28  
29

30  
31  
32 **Figure 2. Rate and adjusted relative risk of preterm birth (PTB) with severe small for**  
33 **gestational age (SGA) – PTB-SGA – for liveborn infants of East Asian-born mothers, stratified**  
34 **by age (upper two plots) and parity (lower two plots).** Relative risks were adjusted for  
35 maternal age (< 20, 20–34, ≥ 35 years), parity (0, 1, 2, 3, ≥ 4), marital status (married/common-  
36 law, unmarried, unknown), residential income quintile (Q1 [lowest] to Q5 [highest], unknown),  
37 infant sex, and twin birth.  
38  
39  
40  
41  
42  
43  
44  
45  
46  
47  
48  
49  
50  
51  
52  
53  
54  
55  
56  
57  
58  
59  
60

## References

1. Salafia CM, Minior VK, Pezzullo JC, Popek EJ, Rosenkrantz TS, Vintzileos AM. Intrauterine growth restriction in infants of less than thirty-two weeks' gestation: associated placental pathologic features. *Am J Obstet Gynecol.* 1995;173(4):1049-57.
2. Ananth CV, Vintzileos AM. Ischemic placental disease: Epidemiology and risk factors. *European Journal of Obstetrics Gynecology and Reproductive Biology.* 2011;159(1):77-82.
3. Katz J, Lee AC, Kozuki N, Lawn JE, Cousens S, Blencowe H, et al. Mortality risk in preterm and small-for-gestational-age infants in low-income and middle-income countries: a pooled country analysis. *Lancet.* 2013;382(9890):417-25.
4. Goldenberg RL, Hauth JC, Andrews WW. Intrauterine infection and preterm delivery. *N Engl J Med.* 2000;342(20):1500-7.
5. Park AL, Urquia ML, Ray JG. Risk of preterm birth according to maternal and paternal country of birth: a population-based study. *JOGC* 2015;37(12):1053-62.
6. De Souza LR, Urquia ML, Sgro M, Ray JG. One size does not fit all: differences in newborn weight among mothers of Philippine and other East Asian origin. *JOGC* 2012;34(11):1026-37.
7. Fuller-Thomson E, Rotermann M, Ray JG. Elevated risk factors for adverse pregnancy outcomes among Filipina-Canadian women. *JOGC* 2010;32(2):113-9.
8. Ray JG, Wanigaratne S, Park AL, Bartsch E, Dzakpasu S, Urquia ML. Preterm preeclampsia in relation to country of birth. *Journal of perinatology : official journal of the California Perinatal Association.* 2016.
9. Immigration and Ethnocultural Diversity in Canada: Statistics Canada; 2013 [Available from: <https://www12.statcan.gc.ca/nhs-enm/2011/as-sa/99-010-x/99-010-x2011001-eng.cfm>.
10. Zhang J, Mikolajczyk R, Grewal J, Neta G, Klebanoff M. Prenatal application of the individualized fetal growth reference. *American journal of epidemiology.* 2011;173(5):539-43.
11. Bartsch E, Park AL, Pulver AJ, Urquia ML, Ray JG. Maternal and paternal birthplace and risk of stillbirth. *Journal of obstetrics and gynaecology Canada : JOGC* 2015;37(4):314-23.
12. Ray JG, Vermeulen MJ, Schull MJ, Singh G, Shah R, Redelmeier DA. Results of the recent immigrant pregnancy and perinatal long-term evaluation study (RIPPLES). *CMAJ* 2007;176(10):1419-26.
13. Wilkins R, Peters PA. Postal code conversion file, PCCF+ version 5K Health Analysis Division: Statistics Canada; 2012 [
14. Mukerji G, Chiu M, Shah BR. Gestational diabetes mellitus and pregnancy outcomes among Chinese and South Asian women in Canada. *The journal of maternal-fetal & neonatal medicine : the official journal of the European Association of Perinatal Medicine, the Federation of Asia and Oceania Perinatal Societies, the International Society of Perinatal Obstet.* 2013;26(3):279-84.
15. Flenady V, Koopmans L, Middleton P, Froen JF, Smith GC, Gibbons K, et al. Major risk factors for stillbirth in high-income countries: a systematic review and meta-analysis. *Lancet.* 2011;377(9774):1331-40.
16. Mullan Z, Horton R. Bringing stillbirths out of the shadows. *Lancet* 2011;377(9774):1291-2.
17. McDonald JT, Kennedy S. Insights into the 'healthy immigrant effect': health status and health service use of immigrants to Canada. *Social science & medicine.* 2004;59(8):1613-27.

18. Tucker CM, Berrien K, Menard MK, Herring AH, Daniels J, Rowley DL, et al. Predicting Preterm Birth Among Women Screened by North Carolina's Pregnancy Medical Home Program. *Matern Child Health J.* 2015;19(11):2438-52.
19. Catov JM, Nohr EA, Olsen J, Ness RB. Chronic hypertension related to risk for preterm and term small for gestational age births. *Obstet Gynecol.* 2008;112(2 Pt 1):290-6.
20. Zetterstrom K, Lindeberg SN, Haglund B, Hanson U. Chronic hypertension as a risk factor for offspring to be born small for gestational age. *Acta Obstetrica et Gynecologica Scandinavica.* 2006;85(9):1046-50.
21. Bartsch E, Medcalf KE, Park AL, Ray JG. Clinical risk factors for pre-eclampsia determined in early pregnancy: systematic review and meta-analysis of large cohort studies. *Bmj.* 2016;353:i1753.
22. Sibai B, Dekker G, Kupferminc M. Pre-eclampsia. *Lancet.* 2005;365(9461):785-99.
23. Lausman A, Kingdom J, Gagnon R, Basso M, Bos H, Crane J, et al. Intrauterine growth restriction: screening, diagnosis, and management. *JOGC* 2013;35(8):741-57.
24. Henderson JT, Whitlock EP, O'Conner E, Senger CA, Thompson JH, Rowland MG. Low-Dose Aspirin for the Prevention of Morbidity and Mortality From Preeclampsia: A Systematic Evidence Review for the US Preventive Services Task Force. U.S. Preventive Services Task Force Evidence Syntheses, formerly Systematic Evidence Reviews. Rockville (MD)2014.
25. National Collaborating Centre for Women's and Children's Health (UK). Hypertension in Pregnancy: The Management of Hypertensive Disorders During Pregnancy. National Institute for Health and Clinical Excellence: Guidance. 2010.
26. Kuc S, Koster MP, Franx A, Schielen PC, Visser GH. Maternal characteristics, mean arterial pressure and serum markers in early prediction of preeclampsia. *PloS one.* 2013;8(5):e63546.
27. Hecher K, Bilardo CM, Stigter RH, Ville Y, Hackeloer BJ, Kok HJ, et al. Monitoring of fetuses with intrauterine growth restriction: a longitudinal study. *Ultrasound Obstet Gynecol.* 2001;18(6):564-70.

**Table 1. Characteristics of live singleton and twin births and their mothers, who delivered at 24 to 42 weeks' gestation in Ontario, 2002 to 2011.** All data are presented as a number (%) unless otherwise indicated.

| Characteristic                  | East Asian maternal country of birth |                         |                           |                         |                             | Canadian maternal country of birth<br>(n = 858,654) |
|---------------------------------|--------------------------------------|-------------------------|---------------------------|-------------------------|-----------------------------|-----------------------------------------------------|
|                                 | China<br>(n = 42,517)                | Hong Kong<br>(n = 5618) | South Korea<br>(n = 5148) | Vietnam<br>(n = 15,297) | Philippines<br>(n = 27,946) |                                                     |
| <b>Of the mother</b>            |                                      |                         |                           |                         |                             |                                                     |
| Mean (SD) age, years            | 32.3 (4.7)                           | 33.5 (4.3)              | 32.1 (3.9)                | 31.4 (4.8)              | 32.6 (5.4)                  | 29.5 (5.5)                                          |
| Age category, years             |                                      |                         |                           |                         |                             |                                                     |
| < 20                            | 81 (0.2)                             | 17 (0.3)                | 7 (0.1)                   | 68 (0.4)                | 353 (1.3)                   | 38920 (4.5)                                         |
| 20-34                           | 28163 (66.2)                         | 3346 (59.6)             | 3801 (73.8)               | 11178 (73.1)            | 17042 (61.0)                | 662500 (77.2)                                       |
| ≥ 35                            | 14273 (33.6)                         | 2255 (40.1)             | 1340 (26.0)               | 4051 (26.5)             | 10551 (37.8)                | 157234 (18.3)                                       |
| Unknown                         |                                      |                         |                           |                         |                             |                                                     |
| Parity                          | 1 (0-1)                              | 0 (0-1)                 | 1 (0-1)                   | 1 (0-1)                 | 1 (0-1)                     | 1 (0-1)                                             |
| 0                               | 21160 (49.8)                         | 3104 (55.3)             | 2552 (49.6)               | 6809 (44.5)             | 12698 (45.4)                | 389635 (45.4)                                       |
| 1                               | 17836 (42.0)                         | 2023 (36.0)             | 1990 (38.7)               | 5984 (39.1)             | 9905 (35.4)                 | 304847 (35.5)                                       |
| 2                               | 3012 (7.1)                           | 413 (7.4)               | 505 (9.8)                 | 1896 (12.4)             | 3921 (14.0)                 | 111814 (13.0)                                       |
| 3                               | 410 (1.0)                            | 59 (1.1)                | 78 (1.5)                  | 470 (3.1)               | 1047 (3.7)                  | 33591 (3.9)                                         |
| ≥ 4                             | 99 (0.2)                             | 19 (0.3)                | 23 (0.4)                  | 138 (0.9)               | 375 (1.3)                   | 18767 (2.2)                                         |
| Marital status                  |                                      |                         |                           |                         |                             |                                                     |
| Married/common-law              | 36668 (86.2)                         | 5205 (92.6)             | 4829 (93.8)               | 10899 (71.2)            | 22304 (79.8)                | 578402 (67.4)                                       |
| Unmarried                       | 3764 (8.9)                           | 236 (4.2)               | 107 (2.1)                 | 2388 (15.6)             | 3125 (11.2)                 | 132698 (15.5)                                       |
| Unknown                         | 2085 (4.9)                           | 177 (3.2)               | 212 (4.1)                 | 2010 (13.1)             | 2517 (9.0)                  | 147554 (17.2)                                       |
| Residential income quintile (Q) |                                      |                         |                           |                         |                             |                                                     |
| Q1 (lowest)                     | 12391 (29.1)                         | 512 (9.1)               | 1183 (23.0)               | 4091 (26.7)             | 8992 (32.2)                 | 150194 (17.5)                                       |
| Q2                              | 11092 (26.1)                         | 1119 (19.9)             | 976 (19.0)                | 3454 (22.6)             | 6770 (24.2)                 | 159370 (18.6)                                       |
| Q3                              | 7328 (17.2)                          | 1193 (21.2)             | 1021 (19.8)               | 3336 (21.8)             | 5445 (19.5)                 | 177349 (20.7)                                       |
| Q4                              | 6236 (14.7)                          | 1487 (26.5)             | 1021 (19.8)               | 2526 (16.5)             | 4183 (15.0)                 | 192726 (22.4)                                       |
| Q5 (highest)                    | 3971 (9.3)                           | 1148 (20.4)             | 852 (16.6)                | 1387 (9.1)              | 2342 (8.4)                  | 166173 (19.4)                                       |
| Unknown                         | 1499 (3.5)                           | 159 (2.8)               | 95 (1.8)                  | 503 (3.3)               | 214 (0.8)                   | 12842 (1.5)                                         |
| <b>Of the newborn infant</b>    |                                      |                         |                           |                         |                             |                                                     |
| Female sex                      | 20519 (48.3)                         | 2703 (48.1)             | 2444 (47.5)               | 7381 (48.3)             | 13491 (48.3)                | 418726 (48.8)                                       |
| Twin births                     | 901 (2.1)                            | 156 (2.8)               | 105 (2.0)                 | 286 (1.9)               | 554 (2.0)                   | 29075 (3.4)                                         |

SD Standard deviation

1  
2  
3  
4  
5  
6  
7  
8  
9  
10  
11  
12  
13  
14  
15  
16  
17  
18  
19  
20  
21  
22  
23  
24  
25  
26  
27  
28  
29  
30  
31  
32  
33  
34  
35  
36  
37  
38  
39  
40  
41  
42  
43  
44  
45  
46  
47  
48  
49  
50  
51  
52  
53  
54  
55  
56  
57  
58  
59  
60

Figure 1. Rate and crude (red circles) and adjusted (black squares) relative risk of preterm birth (PTB) without severe small for gestational age (SGA [upper]), SGA without PTB (middle), and PTB with SGA (PTB-SGA [lower]) for liveborn infants of East Asian-born mothers. Relative risks were adjusted for maternal age (< 20, 20–34, ≥ 35 years), parity (0, 1, 2, 3, ≥ 4), marital status (married/common-law, unmarried, unknown), residential income quintile (Q1 [lowest] to Q5 [highest], unknown), infant sex, and twin birth.

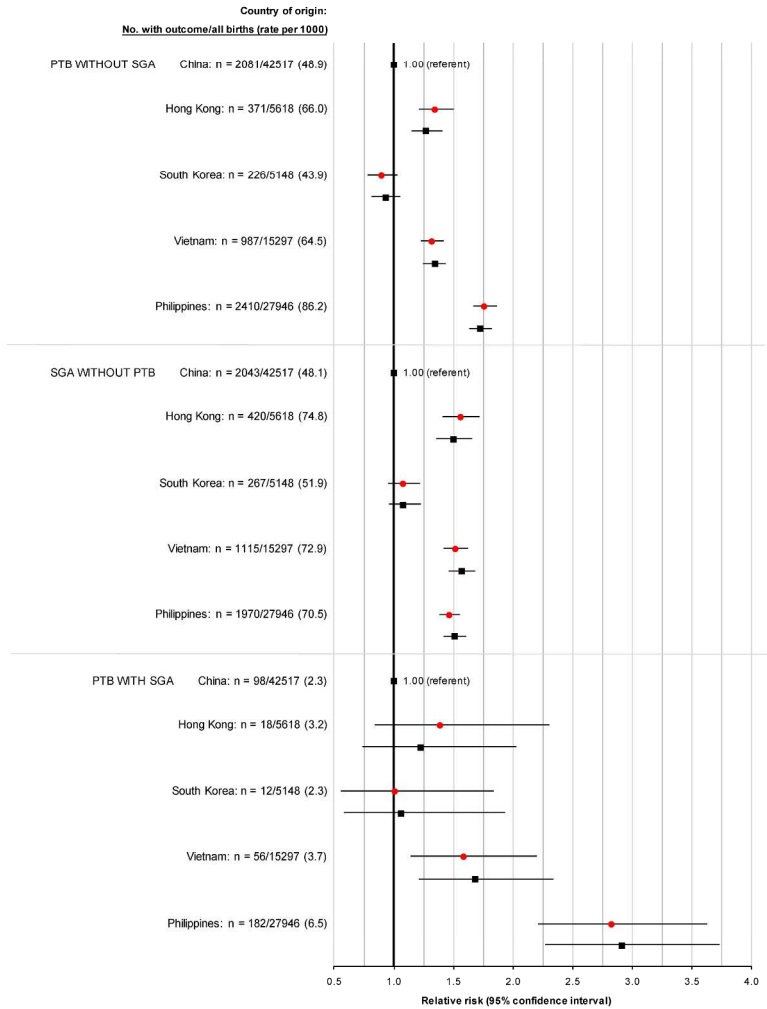

279x361mm (300 x 300 DPI)

Figure 2. Rate and adjusted relative risk of preterm birth (PTB) with severe small for gestational age (SGA) – PTB-SGA – for liveborn infants of East Asian-born mothers, stratified by age (upper two plots) and parity (lower two plots). Relative risks were adjusted for maternal age (< 20, 20–34, ≥ 35 years), parity (0, 1, 2, 3, ≥ 4), marital status (married/common-law, unmarried, unknown), residential income quintile (Q1 [lowest] to Q5 [highest], unknown), infant sex, and twin birth.

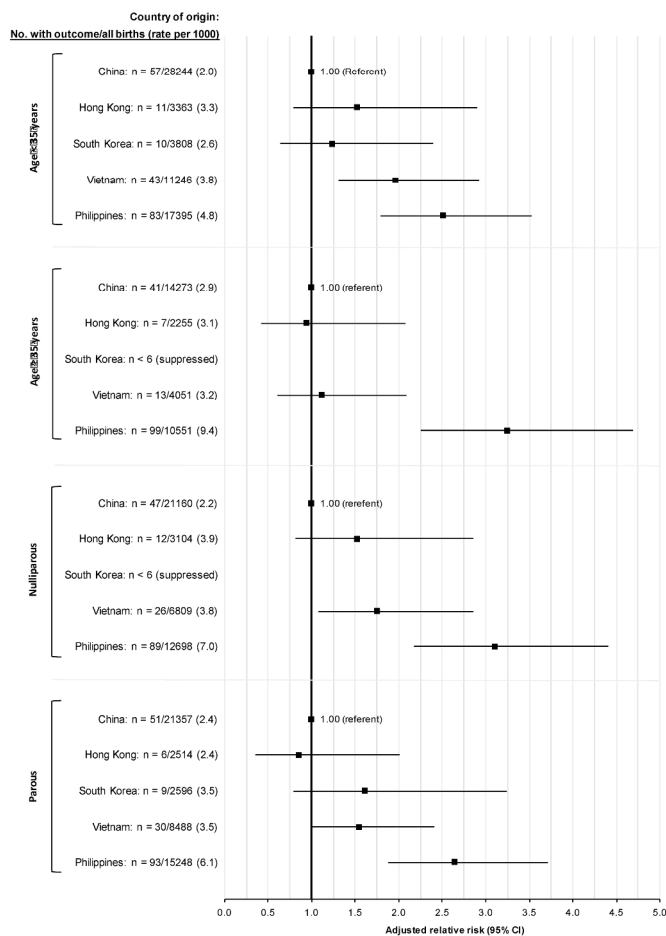

279x361mm (300 x 300 DPI)

Supplementary file 1. Rate and crude (red circles) and adjusted (black squares) relative risk of preterm birth with severe small for gestational age birthweight for liveborn singleton infants of East Asian-born mothers. Relative risks were adjusted for maternal age (< 20, 20–34, ≥ 35 years), parity (0, 1, 2, 3, ≥ 4), marital status (married/common-law, unmarried, unknown), residential income quintile (Q1 [lowest] to Q5 [highest], unknown) and infant sex.

1  
2  
3  
4  
5  
6  
7  
8  
9  
10  
11  
12  
13  
14  
15  
16  
17  
18  
19  
20  
21  
22  
23  
24  
25  
26  
27  
28  
29  
30  
31  
32  
33  
34  
35  
36  
37  
38  
39  
40  
41  
42  
43  
44  
45  
46  
47  
48  
49  
50  
51  
52  
53  
54  
55  
56  
57  
58  
59  
60

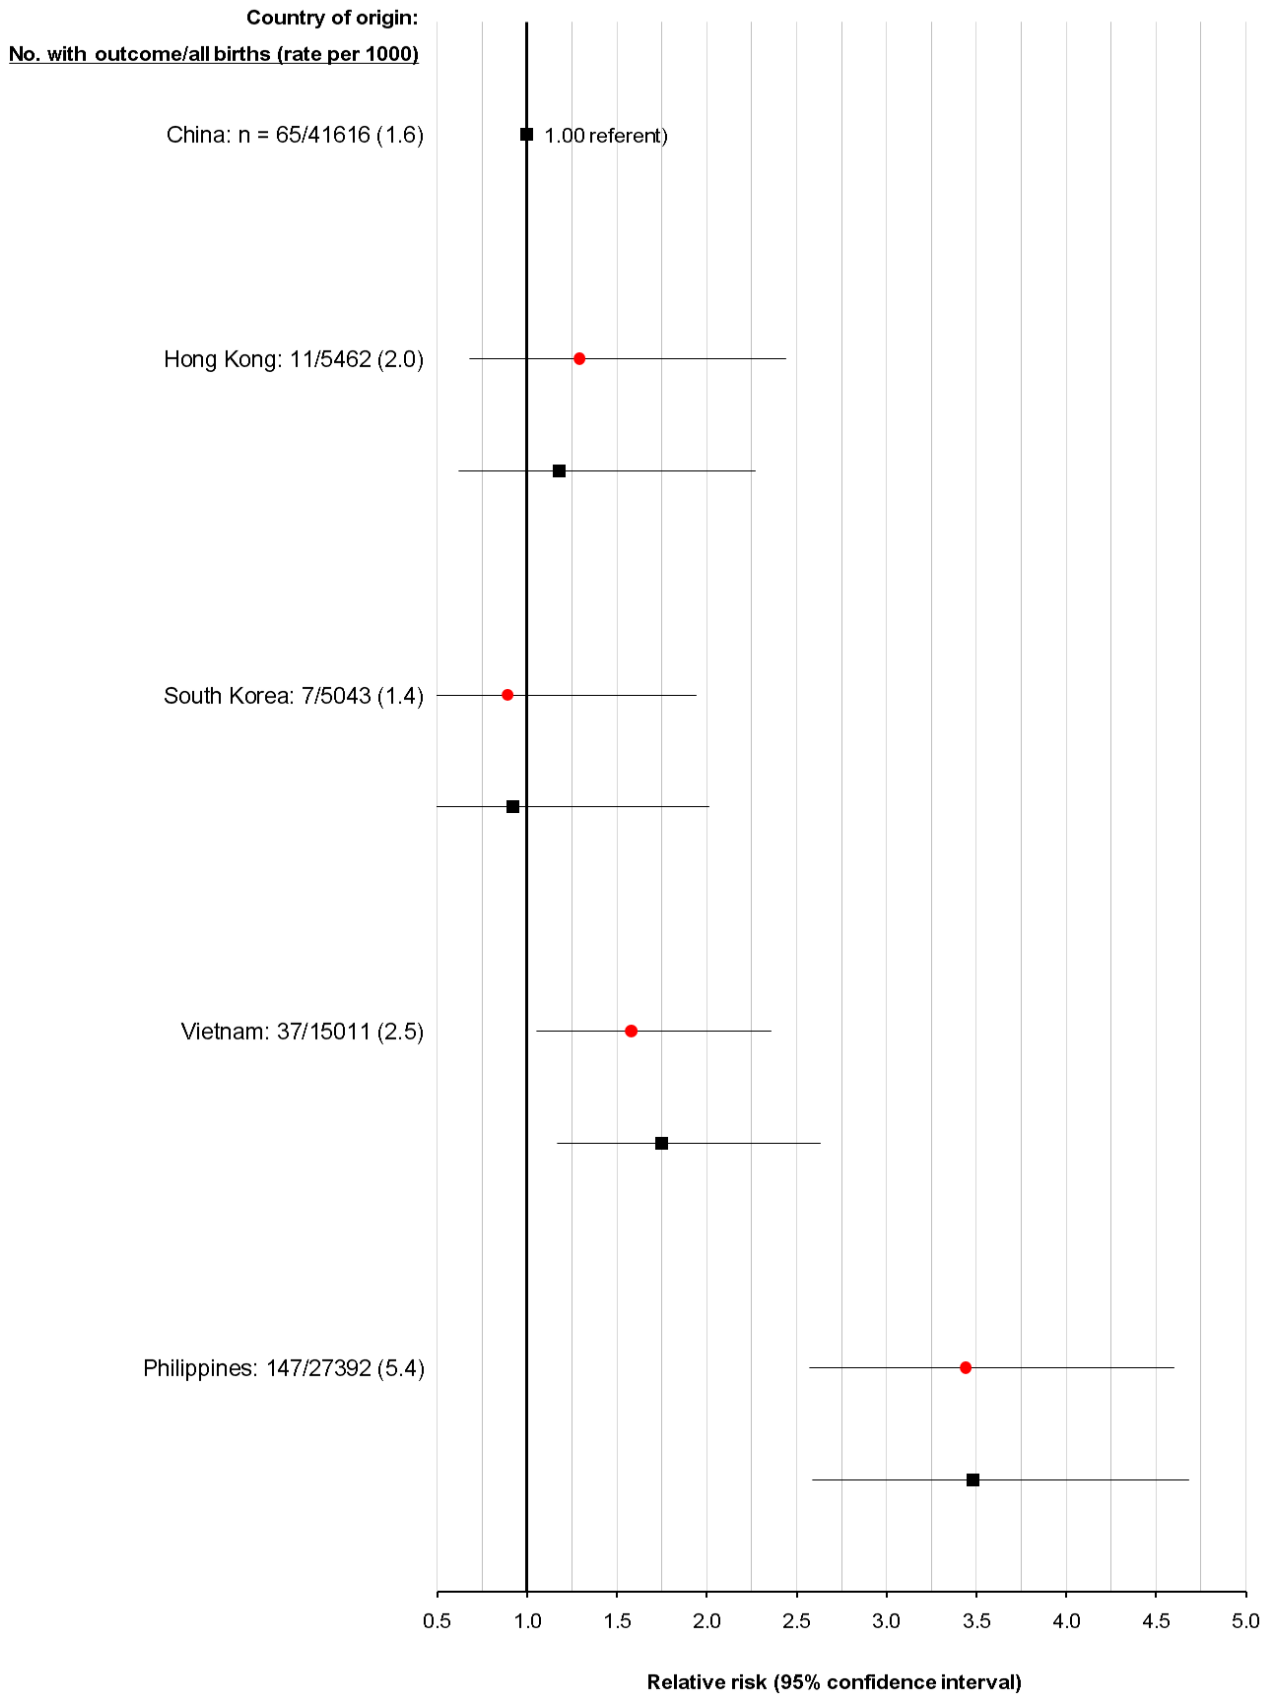



# BMJ Open

## Concomitant preterm birth and severe small-for-gestational age birthweight among infants of immigrant mothers in Ontario originating from the Philippines and East Asia

|                                 |                                                                                                                                                                                                                                                                                                       |
|---------------------------------|-------------------------------------------------------------------------------------------------------------------------------------------------------------------------------------------------------------------------------------------------------------------------------------------------------|
| Journal:                        | <i>BMJ Open</i>                                                                                                                                                                                                                                                                                       |
| Manuscript ID                   | bmjopen-2016-015386.R1                                                                                                                                                                                                                                                                                |
| Article Type:                   | Research                                                                                                                                                                                                                                                                                              |
| Date Submitted by the Author:   | 16-May-2017                                                                                                                                                                                                                                                                                           |
| Complete List of Authors:       | Bartsch, Emily; St. Michael's Hospital, Li Ka Shing Knowledge Institute Park, Alston<br>Jairam, Jennifer; St. Michael's Hospital, University of Toronto, Medicine, and Obstetrics and Gynecology<br>Ray, Joel; St. Michael's Hospital, University of Toronto, Medicine, and Obstetrics and Gynecology |
| <b>Primary Subject Heading</b>: | Obstetrics and gynaecology                                                                                                                                                                                                                                                                            |
| Secondary Subject Heading:      | Paediatrics                                                                                                                                                                                                                                                                                           |
| Keywords:                       | OBSTETRICS, Ethnicity, Preterm birth                                                                                                                                                                                                                                                                  |
|                                 |                                                                                                                                                                                                                                                                                                       |

SCHOLARONE™  
Manuscripts

1  
2  
3 **Concomitant preterm birth and severe small-for-gestational age birthweight**  
4 **among infants of immigrant mothers in Ontario originating from the Philippines and East Asia**  
5  
6

7 Emily Bartsch, BMSc  
8 University of Toronto  
9 Toronto, Ontario, Canada  
10

11  
12 Alison L. Park, MSc  
13 Institute for Clinical Evaluative Sciences  
14 Toronto, Ontario, Canada  
15

16  
17 Jennifer Jairam, MSc PhD(c)  
18 University of Toronto  
19 Toronto, Ontario, Canada  
20

21  
22 Joel G. Ray, MD MSc  
23 Departments of Medicine, Health Policy Management and Evaluation,  
24 and Obstetrics and Gynecology  
25 St. Michael's Hospital, University of Toronto  
26 Toronto, Ontario, Canada  
27  
28  
29  
30  
31

32 **Corresponding author:**

33 Joel G Ray  
34 Department of Medicine, St. Michael's Hospital  
35 30 Bond Street  
36 Toronto, Ontario  
37 M5B 1W8  
38 Tel: (416) 864-6060, Ext 77442  
39 Fax : (416) 864-5485  
40 e-mail: rayj@smh.ca  
41  
42  
43  
44  
45  
46  
47  
48  
49  
50  
51  
52  
53  
54

55 **Text word count:** 1789

56 **Abstract word count:** 246  
57  
58  
59  
60

## Abstract

**Objectives:** Women from the Philippines form one of the largest immigrant groups to North America. Their newborns experience higher rates of preterm birth (PTB), and separately, small-for-gestational age (SGA) birthweight, compared to other East Asians. It is not known if Filipina women are at elevated risk of concomitant PTB and severe SGA (PTB-SGA), a pathological state likely reflective of placental dysfunction and neonatal morbidity.

**Methods:** We conducted a population-based study of all singleton or twin livebirths in Ontario, from 2002 to 2011, among immigrant mothers from the Philippines (N = 27,946), Vietnam (N = 15,297), Hong Kong (N = 5618), South Korea (N = 5148) and China (N = 42,517). We used modified Poisson regression to generate relative risks (RR) of PTB-SGA, defined as a birth < 37 weeks' gestation and a birthweight < 5<sup>th</sup> percentile. RRs were adjusted for maternal age, parity, marital status, income quintile, infant sex and twin births.

**Results:** Relative to mothers from China (2.3 per 1000), the rate of PTB-SGA was significantly higher among infants of mothers from the Philippines (6.5 per 1000; RR 2.91, 95% CI 2.27-3.73), and those from Vietnam (3.7 per 1000; RR 1.68, 95% CI 1.21-2.34). The RR of PTB-SGA was not higher for infants of mothers from Hong Kong or South Korea.

**Interpretation:** Among infants born to immigrant women from five East Asian birthplaces, the risk of PTB-SGA was highest among those from the Philippines. These women and their fetuses may require additional monitoring and interventions.

**Keywords:** Preterm birth; small for gestational age birthweight; ethnicity; race; immigrant; East Asia; Philippines; Filipina; Viet Nam.

**Article summary: Strengths and limitations of this study**

- We conducted a population-based study of all livebirths in Ontario, comparing immigrant mothers from the Philippines (N = 27,946), Vietnam (N = 15,297), Hong Kong (N = 5618), South Korea (N = 5148) to those from China (N = 42,517).
- The rate of PTB-SGA was highest among infants of mothers from the Philippines (6.5 per 1000), which was 2.91 (95% confidence interval [CI] 2.27-3.73) times higher than women from China.
- Among infants born to immigrant women from five East Asian birthplaces, the risk of PTB-SGA was highest among those from the Philippines. These women and their fetuses may require additional monitoring and interventions.
- We excluded stillbirths, who are potentially the most pathological group of fetuses, and who are at risk of PTB-SGA.
- We lacked data on skillset and level of education at immigration, immigration class, and duration of residence at the time of the index birth. We also did not possess information on parental height or weight.

## Background

A pregnancy resulting in a preterm birth (PTB) and concomitant small for gestational age birthweight (SGA) – “PTB-SGA” – is thought to be most pathological, in terms of both being due to placental dysfunction<sup>1 2</sup> and their adverse sequelae for the newborn infant<sup>3 4</sup>. Relative to infants born either PTB alone or SGA alone, those affected by PTB-SGA are 15 times more likely to die in the first month of life<sup>3</sup>.

PTB<sup>5</sup> and SGA<sup>6</sup> are each more frequent in women from the Philippines. Chronic hypertension<sup>7</sup> and preterm onset of preeclampsia<sup>8</sup> are each risk factors for provider-initiated (“iatrogenic”) PTB and SGA, and they are significantly more likely to present in Filipina women than Caucasian or other East Asian women. What remains unknown is whether the risk of PTB-SGA is higher among Filipina women than their counterparts from other East Asian regions.

Herein, we performed a study in Ontario, Canada, where foreign-born individuals comprise 20% of the population and nearly 35% of all births, the highest proportion of G8 countries.<sup>9</sup> We compared the risk of PTB-SGA among five East Asian groups, using a < 5<sup>th</sup> percentile cut-off to define severe SGA, which is more predictive of adverse perinatal outcomes than a < 10<sup>th</sup> percentile cut-off<sup>10</sup>.

## Methods

### *Study sample*

This population-based study comprised all live singletons and twin births in Ontario between 2002 and 2011. Data were retrieved from livebirth records provided by Vital Statistics. We excluded stillbirths, as information on parental place of birth is missing for 12% of records<sup>11</sup>. As all records were de-identified, a given woman may have contributed more than one birth during the study period, but we adjusted for parity, as described below. All pregnancy and newborn care is universally covered under Ontario’s Health Insurance Plan. Approximately 95% of Ontarian women undergo prenatal ultrasonography before 20 weeks gestation, enhancing accuracy of gestational age determined at birth.<sup>12</sup>

### *Exposures and outcomes*

The main exposure was maternal place of birth, which was self-reported on the infant's birth record. Each newborn was then assigned to one of five maternal East Asian birthplaces: (1) China (the referent), (2) Hong Kong, (3) South Korea, (4) Vietnam, and (5) the Philippines. Women from China were chosen as the reference group as they are the largest East Asian immigrant group in Ontario<sup>9</sup>, and are have relatively lower rates of PTB and SGA<sup>5,6</sup>. The main study outcome was PTB-SGA, defined as PTB < 37 weeks and severe SGA < 5<sup>th</sup> percentile<sup>10</sup>. The birthweight percentile curves used herein were those for all livebirths in Ontario, and were not otherwise customized by maternal ethnicity or other factors (6,11). Reasons for the latter were that we restricted our cohort solely to births of East Asian mothers, and that defining severe SGA at < 5<sup>th</sup> percentile is a cut-off that reflects pathological intrauterine growth restriction (10). Secondary outcomes were PTB without severe SGA, and severe SGA without PTB.

### *Data analysis*

We used modified Poisson regression models to estimate relative risks (RR) and 95% confidence intervals (CI) for each study outcome in association with maternal place of birth. RR were adjusted for maternal age (< 20, 20–34, ≥ 35 years), parity (0, 1, 2, 3, ≥ 4), marital status (married/common-law, unmarried, unknown), residential income quintile (Q1 [lowest] to Q5 [highest], unknown)<sup>13</sup>, infant sex, and twin births. The “unknown” categories of marital status and residential income quintile were included in the multivariable models. However, for maternal age and parity, we excluded those pregnancies with “unknown” status, given the rarity of this situation and the need to allow model convergence, accordingly.

For the main outcome of PTB-SGA, we additionally performed stratified analyses to examine potential effect measure modification by parity (nulliparous vs. parous) and by maternal age (< 35 years vs. ≥ 35 years).

As the study focus was to compare immigrants from different East Asian birthplaces, Canadian-born mothers were not included in main regression models. However, for comparative purposes, we described the characteristics of Canadian-born mothers and their

1  
2  
3 infants, and ran an additional analysis of the main model of PTB-SGA with Canadian-born  
4 mothers as the referent.  
5

6  
7 Statistical analyses were performed using SAS 9.4 (SAS Institute Inc., Cary NC). Ethics approval  
8 was provided by the Research Ethics Board of St. Michael's Hospital, Toronto, Ontario.  
9

## 10 11 12 **Results**

13  
14 Between 2002 and 2011, there were 956,994 liveborn singleton or twin births in Ontario to  
15 mothers born in Canada, China, Hong Kong, South Korea, Vietnam or the Philippines. We  
16 excluded 893 infants (0.09%) whose gestational age was < 24 or > 42 weeks, and 487 infants  
17 (0.05%) whose gestational age at birth was unknown. We further excluded infants whose  
18 birthweight was unknown (n = 31) or < 500 g (n = 55), whose sex was unknown (n = 1), or in  
19 which maternal age (n = 108) or parity (n = 239) were unknown.  
20  
21

22 The final cohort comprised 42,517 births to mothers from China, 5,618 from Hong Kong, 5,148  
23 from South Korea, 15,297 from Vietnam, and 27,946 from the Philippines. The remainder were  
24 newborns of mothers from Canada (Table 1). In general, mothers from East Asia tended to be  
25 older than Canadian-born women, but of similar parity. Filipina-born mothers were similar in  
26 age, marital status and income to Chinese-born mothers (Table 1).  
27  
28

29 Compared to mothers from China, the outcomes of PTB without severe SGA, and severe SGA  
30 without PTB, were significantly more prevalent among newborns of mothers from Hong Kong,  
31 Vietnam and the Philippines, but not South Korea (Figure 1). The more severe outcome of PTB-  
32 SGA was significantly more common among newborns of mothers from Vietnam (3.7 per 1000;  
33 aRR 1.68 95% CI 1.21 to 2.34), compared to those of mothers from China (2.3 per 1000) (Figure  
34 1). For newborns of Filipina women, the rate (6.5 per 1000) and aRR (2.91, 95% CI 2.27 to 3.73)  
35 were even higher (Figure 1).  
36  
37

38 In our stratified analyses, the risk of PTB-SGA was somewhat more pronounced among Filipina  
39 women aged  $\geq 35$  years or older (Figure 2, upper) and those who were nulliparous (Figure 2,  
40 lower).  
41  
42

43 Limiting the dataset to singleton births did not appreciably change the RR of PTB-SGA, even  
44 heightening the RR among Filipina women (Supplementary file 1).  
45  
46  
47  
48  
49  
50  
51  
52  
53

1  
2  
3 Re-running the main model of PTB-SGA, with Canadian-born mothers as the referent, showed  
4 that only the offspring of Filipina mothers were at higher risk of PTB-SGA (Supplementary file  
5 2).  
6  
7  
8  
9

## 10 Interpretation

11 Newborns of mothers from the Philippines were most vulnerable to PTB-SGA, especially  
12 among women  $\geq 35$  years, who comprised 37% of all Filipina mothers, and in whom the rate of  
13 PTB-SGA was nearly 1%.  
14  
15  
16  
17  
18  
19

## 20 *Strengths and limitations*

21 We evaluated nearly 100,000 livebirths among women born in five East Asian regions, which  
22 are major sources of immigrants to Ontario, in a setting of universal healthcare. Infants of  
23 Chinese-born women provided an ideal reference group, as China is the largest source of  
24 immigrants from East Asia to Ontario, and they have a low incidence of adverse neonatal and  
25 maternal outcomes<sup>5, 14</sup>. The  $< 5^{\text{th}}$  percentile cut-off used to define severe SGA reflects a degree  
26 of smallness that is more likely to be pathological, rather than constitutional<sup>10</sup>. Still, the  
27 outcome of PTB-SGA was not rare – occurring in 6.5 per 1000 infants of Filipina mothers.  
28 Through our analysis, we were able to account for some previously noted risk factors for PTB or  
29 SGA, such as maternal age, infant sex, parity, income level and marital status.  
30  
31  
32  
33  
34  
35  
36  
37

38 A limitation of this study was the exclusion of stillbirths, who are potentially the most  
39 pathological group of fetuses, and who are at risk of PTB-SGA<sup>15, 16</sup>. We lacked data on factors  
40 associated with the so-called “healthy immigrant effect”<sup>17</sup>, such as skillset and level of  
41 education at immigration, immigration class, and duration of residence at the time of the index  
42 birth. We also did not possess information on parental height or weight – which may influence  
43 newborn weight – or conditions such as maternal chronic hypertension and diabetes mellitus,  
44 or maternal behavioural risk factors (e.g. smoking, drug or substance use). However, Filipina  
45 women of reproductive age living in Canada have a rate of smoking under 6.0%, comparable to  
46 that of their East Asian counterparts<sup>7</sup>, and the corresponding rate in pregnancy would be  
47 expected to be even lower. The body mass index (BMI) of Filipina women of reproductive age  
48 tends to be higher than that of other East Asians<sup>7</sup>. It is unlikely that access to prenatal care  
49  
50  
51  
52  
53  
54  
55  
56  
57  
58  
59  
60



1  
2  
3 explains the current findings, as 88% of Filipina women and 85% of other East Asian women in  
4 Canada have a regular medical doctor<sup>7</sup>. Finally, we could not identify the specific causes of PTB-  
5 SGA from the dataset used herein, which is certainly worthy of a focused study focused on  
6 differentiating spontaneous vs. provider-initiated PTB.  
7  
8  
9  
10

### 11 12 13 *Implications*

14 In 2011, 13.1% of all newcomers to Canada were from the Philippines<sup>9</sup>. Women from the  
15 Philippines were at exceptionally high risk of PTB-SGA, peaking at nearly 1% among those aged  
16 35 years and older, and who represent one-third of all Filipina women giving birth in Ontario.  
17 From a public health perspective, there is value in reducing the incidence of PTB-SGA, and such  
18 a strategy might start with Filipina women. For healthcare providers – including family doctors,  
19 obstetricians, or midwives – the priority would be to address risk factors in these women. This  
20 can be done at several time points – before becoming pregnant, during pregnancy, and at the  
21 time of delivery. Before pregnancy, providers can counsel Filipina women, especially those  
22 women older than 35 years of age, on the possibility of adverse perinatal outcomes. During the  
23 pregnancy, risk factors can be identified and managed. Chronic hypertension is one important  
24 risk factor for both PTB<sup>18</sup> and SGA<sup>19 20</sup>, and also for preeclampsia<sup>21</sup>, which can give rise to PTB-  
25 SGA<sup>22</sup>. Chronic hypertension is highly prevalent among Filipina women in Ontario<sup>7</sup>; therefore,  
26 efforts to regulate blood pressure and prevent preeclampsia may help reduce the risk of SGA-  
27 PTB among Filipina women, and also those from Vietnam. Such interventions include aspirin<sup>23-25</sup>  
28 and early pregnancy blood pressure assessments<sup>26</sup>. By the third trimester of pregnancy,  
29 periodic sonographic assessment of fetal growth and well-being should be considered, as there  
30 is evidence that this helps the clinician identify SGA infants and balance the risks of prematurity  
31 against a worsening intrauterine environment<sup>27 28</sup>.  
32  
33  
34  
35  
36  
37  
38  
39  
40  
41  
42  
43  
44  
45  
46  
47  
48

### 49 50 **Conclusions**

51 What differentiates a Filipina woman from another East Asian woman is her heightened risk  
52 of having a liveborn affected by PTB-SGA, a severe pathological state. For Filipina immigrant  
53 women, appropriate cautionary measures should be taken to ensure that mother and baby  
54  
55  
56  
57  
58  
59  
60

1  
2  
3 remain healthy throughout the pregnancy and delivery. Future research should aim to identify  
4 specific, and ideally modifiable, traits of Filipina women that increase the risk of PTB-SGA during  
5 pregnancy. Specifically, it would be worthwhile to evaluate whether the rates of smoking, high  
6 BMI, or other socioeconomic indicators differ between pregnant Filipina women and those  
7 women from other East Asian birthplaces.  
8  
9  
10  
11  
12

13  
14 **Authors contributions:** Bartsch contributed to the study concept, analysis and interpretation of  
15 the data, drafting of manuscript, manuscript revision and approval of final version. Ray  
16 contributed to the study concept, analysis and interpretation of the data, drafting of  
17 manuscript, manuscript revision, and approval of final version. Park contributed to the analysis  
18 and interpretation of the data, drafting of manuscript, manuscript revision, and approval of  
19 final version. Jairam contributed to the interpretation of the data and approval of final version.  
20  
21  
22  
23  
24  
25  
26  
27

28 **Data sharing statement:** No additional data available.  
29  
30

31 **Details of ethics approval:** Ethics approval was granted by the Research Ethics Board of St.  
32 Michael's Hospital in Toronto, Ontario, Canada.  
33  
34  
35  
36

37 **Funding statement:** This work was supported by a grant from the Canadian Institutes of Health  
38 Research (CIHR). JGR holds a Canadian Institutes for Health Research Chair in Reproductive and  
39 Child Health Services and Policy Research, co-funded by the SickKids Foundation.  
40  
41  
42  
43  
44

45 **Competing interests:** None.  
46  
47  
48  
49  
50  
51  
52  
53  
54  
55  
56  
57  
58  
59  
60

**FIGURE LEGENDS**

Figure 1. Rate and crude (red circles) and adjusted (black squares) relative risk of preterm birth (PTB) without severe small for gestational age (SGA [upper]), SGA without PTB (middle), and PTB with SGA (PTB-SGA [lower]) for liveborn infants of East Asian-born mothers. Relative risks were adjusted for maternal age (< 20, 20–34, ≥ 35 years), parity (0, 1, 2, 3, ≥ 4), marital status (married/common-law, unmarried, unknown), residential income quintile (Q1 [lowest] to Q5 [highest], unknown), infant sex, and twin birth.

Figure 2. Rate and adjusted relative risk of preterm birth (PTB) with severe small for gestational age (SGA) – PTB-SGA – for liveborn infants of East Asian-born mothers, stratified by age (upper two plots) and parity (lower two plots). Relative risks were adjusted for maternal age (< 20, 20–34, ≥ 35 years), parity (0, 1, 2, 3, ≥ 4), marital status (married/common-law, unmarried, unknown), residential income quintile (Q1 [lowest] to Q5 [highest], unknown), infant sex, and twin birth.

## References

1. Salafia CM, Minior VK, Pezzullo JC, et al. Intrauterine growth restriction in infants of less than thirty-two weeks' gestation: associated placental pathologic features. *Am J Obstet Gynecol* 1995;173(4):1049-57.
2. Ananth CV, Vintzileos AM. Ischemic placental disease: Epidemiology and risk factors. *Eur J Obstet Gynecol Reprod Biol* 2011;159(1):77-82.
3. Katz J, Lee AC, Kozuki N, et al. Mortality risk in preterm and small-for-gestational-age infants in low-income and middle-income countries: a pooled country analysis. *Lancet* 2013;382(9890):417-25. doi: 10.1016/s0140-6736(13)60993-9
4. Goldenberg RL, Hauth JC, Andrews WW. Intrauterine infection and preterm delivery. *N Engl J Med* 2000;342(20):1500-7. doi: 10.1056/nejm200005183422007
5. Park AL, Urquia ML, Ray JG. Risk of Preterm Birth According to Maternal and Paternal Country of Birth: A Population-Based Study. *J Obstet Gynaecol Can* 2015;37(12):1053-62.
6. De Souza LR, Urquia ML, Sgro M, et al. One size does not fit all: differences in newborn weight among mothers of Philippine and other East Asian origin. *J Obstet Gynaecol Can* 2012;34(11):1026-37.
7. Fuller-Thomson E, Rotermann M, Ray JG. Elevated risk factors for adverse pregnancy outcomes among Filipina-Canadian women. *J Obstet Gynaecol Can* 2010;32(2):113-9.
8. Ray JG, Wanigaratne S, Park AL, et al. Preterm preeclampsia in relation to country of birth. *J Perinatol* 2016;36(9):718-22. doi: 10.1038/jp.2016.73
9. Immigration and Ethnocultural Diversity in Canada: Statistics Canada; 2013 [Available from: <https://www12.statcan.gc.ca/nhs-enm/2011/as-sa/99-010-x/99-010-x2011001-eng.cfm>], accessed August 3, 2016.
10. Zhang J, Mikolajczyk R, Grewal J, et al. Prenatal application of the individualized fetal growth reference. *Am Journal Epidemiol* 2011;173(5):539-43. doi: 10.1093/aje/kwq411
11. Bartsch E, Park AL, Pulver AJ, et al. Maternal and paternal birthplace and risk of stillbirth. *J Obstet Gynaecol Can* 2015;37(4):314-23.
12. Ray JG, Vermeulen MJ, Schull MJ, et al. Results of the recent immigrant pregnancy and perinatal long-term evaluation study (RIPPLES). *CMAJ* 2007;176(10):1419-26.
13. Wilkins R, Peters PA. Postal code conversion file, PCCF+ version 5K Health Analysis Division: Statistics Canada; 2012 [Available from: <http://www5.statcan.gc.ca/olc-olc/olc.action?ObjId=92-154-X&ObjType=2&lang=en&limit=0>], accessed August 3, 2016.
14. Mukerji G, Chiu M, Shah BR. Gestational diabetes mellitus and pregnancy outcomes among Chinese and South Asian women in Canada. *J Matern Fetal Neonatal Med* 2013;26(3):279-84. doi: 10.3109/14767058.2012.735996
15. Flenady V, Koopmans L, Middleton P, et al. Major risk factors for stillbirth in high-income countries: a systematic review and meta-analysis. *Lancet* 2011;377(9774):1331-40. doi: 10.1016/s0140-6736(10)62233-7
16. Mullan Z, Horton R. Bringing stillbirths out of the shadows. *Lancet* 2011;377(9774):1291-2. doi: 10.1016/s0140-6736(11)60098-6
17. McDonald JT, Kennedy S. Insights into the 'healthy immigrant effect': health status and health service use of immigrants to Canada. *Soc Sci Med* 2004;59(8):1613-27. doi: 10.1016/j.socscimed.2004.02.004

18. Tucker CM, Berrien K, Menard MK, et al. Predicting Preterm Birth Among Women Screened by North Carolina's Pregnancy Medical Home Program. *Matern Child Health J* 2015;19(11):2438-52. doi: 10.1007/s10995-015-1763-5
19. Catov JM, Nohr EA, Olsen J, et al. Chronic hypertension related to risk for preterm and term small for gestational age births. *Obstet Gynecol* 2008;112(2 Pt 1):290-6. doi: 10.1097/AOG.0b013e31817f589b
20. Zetterstrom K, Lindeberg SN, Haglund B, et al. Chronic hypertension as a risk factor for offspring to be born small for gestational age. *Acta Obstetrica et Gynecologica Scandinavica* 2006;85(9):1046-50.
21. Bartsch E, Medcalf KE, Park AL, et al. Clinical risk factors for pre-eclampsia determined in early pregnancy: systematic review and meta-analysis of large cohort studies. *BMJ* 2016;353:i1753. doi: 10.1136/bmj.i1753
22. Sibai B, Dekker G, Kupfermanc M. Pre-eclampsia. *Lancet* 2005;365(9461):785-99. doi: 10.1016/s0140-6736(05)17987-2
23. Lausman A, Kingdom J, Gagnon R, et al. Intrauterine growth restriction: screening, diagnosis, and management. *J Obstet Gynaecol Can* 2013;35(8):741-57.
24. Henderson JT, Whitlock EP, O'Conner E, et al. Low-Dose Aspirin for the Prevention of Morbidity and Mortality From Preeclampsia: A Systematic Evidence Review for the US Preventive Services Task Force. *Rockville (MD): Agency for Healthcare Research and Quality (US)* 2014;Report No.: 14-05207-EF-1.
25. National Collaborating Centre for Women's and Children's Health (UK). Hypertension in Pregnancy: The Management of Hypertensive Disorders During Pregnancy. *National Institute for Health and Clinical Excellence: Guidance. London: RCOG Press* 2010.
26. Kuc S, Koster MP, Franx A, et al. Maternal characteristics, mean arterial pressure and serum markers in early prediction of preeclampsia. *PloS one* 2013;8(5):e63546. doi: 10.1371/journal.pone.0063546
27. Hecher K, Bilardo CM, Stigter RH, et al. Monitoring of fetuses with intrauterine growth restriction: a longitudinal study. *Ultrasound Obstet Gynecol* 2001;18(6):564-70. doi: 10.1046/j.0960-7692.2001.00590.x
28. Nguyen PH, Addo OY, Young M, et al. Patterns of Fetal Growth Based on Ultrasound Measurement and its Relationship with Small for Gestational Age at Birth in Rural Vietnam. *Paediatrics Perinat Epidemiol* 2016;30(3):256-66. doi: 10.1111/ppe.12276

Table 1. Characteristics of live singleton and twin births and their mothers, who delivered at 24 to 42 weeks' gestation in Ontario, 2002 to 2011. All data are presented as a number (%) unless otherwise indicated.

| Characteristic                  | East Asian maternal place of birth |                         |                           |                         |                             | Canadian maternal country of birth<br>(n = 858,654) |
|---------------------------------|------------------------------------|-------------------------|---------------------------|-------------------------|-----------------------------|-----------------------------------------------------|
|                                 | China<br>(n = 42,517)              | Hong Kong<br>(n = 5618) | South Korea<br>(n = 5148) | Vietnam<br>(n = 15,297) | Philippines<br>(n = 27,946) |                                                     |
| <b>Of the mother</b>            |                                    |                         |                           |                         |                             |                                                     |
| Mean (SD) age, years            | 32.3 (4.7)                         | 33.5 (4.3)              | 32.1 (3.9)                | 31.4 (4.8)              | 32.6 (5.4)                  | 29.5 (5.5)                                          |
| Age category, years             |                                    |                         |                           |                         |                             |                                                     |
| < 20                            | 81 (0.2)                           | 17 (0.3)                | 7 (0.1)                   | 68 (0.4)                | 353 (1.3)                   | 38920 (4.5)                                         |
| 20-34                           | 28163 (66.2)                       | 3346 (59.6)             | 3801 (73.8)               | 11178 (73.1)            | 17042 (61.0)                | 662500 (77.2)                                       |
| ≥ 35                            | 14273 (33.6)                       | 2255 (40.1)             | 1340 (26.0)               | 4051 (26.5)             | 10551 (37.8)                | 157234 (18.3)                                       |
| Parity                          | 1 (0-1)                            | 0 (0-1)                 | 1 (0-1)                   | 1 (0-1)                 | 1 (0-1)                     | 1 (0-1)                                             |
| 0                               | 21160 (49.8)                       | 3104 (55.3)             | 2552 (49.6)               | 6809 (44.5)             | 12698 (45.4)                | 389635 (45.4)                                       |
| 1                               | 17836 (42.0)                       | 2023 (36.0)             | 1990 (38.7)               | 5984 (39.1)             | 9905 (35.4)                 | 304847 (35.5)                                       |
| 2                               | 3012 (7.1)                         | 413 (7.4)               | 505 (9.8)                 | 1896 (12.4)             | 3921 (14.0)                 | 111814 (13.0)                                       |
| 3                               | 410 (1.0)                          | 59 (1.1)                | 78 (1.5)                  | 470 (3.1)               | 1047 (3.7)                  | 33591 (3.9)                                         |
| ≥ 4                             | 99 (0.2)                           | 19 (0.3)                | 23 (0.4)                  | 138 (0.9)               | 375 (1.3)                   | 18767 (2.2)                                         |
| Marital status                  |                                    |                         |                           |                         |                             |                                                     |
| <i>Married/common-law</i>       | 36668 (86.2)                       | 5205 (92.6)             | 4829 (93.8)               | 10899 (71.2)            | 22304 (79.8)                | 578402 (67.4)                                       |
| <i>Unmarried</i>                | 3764 (8.9)                         | 236 (4.2)               | 107 (2.1)                 | 2388 (15.6)             | 3125 (11.2)                 | 132698 (15.5)                                       |
| <i>Unknown</i>                  | 2085 (4.9)                         | 177 (3.2)               | 212 (4.1)                 | 2010 (13.1)             | 2517 (9.0)                  | 147554 (17.2)                                       |
| Residential income quintile (Q) |                                    |                         |                           |                         |                             |                                                     |
| <i>Q1 (lowest)</i>              | 12391 (29.1)                       | 512 (9.1)               | 1183 (23.0)               | 4091 (26.7)             | 8992 (32.2)                 | 150194 (17.5)                                       |
| <i>Q2</i>                       | 11092 (26.1)                       | 1119 (19.9)             | 976 (19.0)                | 3454 (22.6)             | 6770 (24.2)                 | 159370 (18.6)                                       |
| <i>Q3</i>                       | 7328 (17.2)                        | 1193 (21.2)             | 1021 (19.8)               | 3336 (21.8)             | 5445 (19.5)                 | 177349 (20.7)                                       |
| <i>Q4</i>                       | 6236 (14.7)                        | 1487 (26.5)             | 1021 (19.8)               | 2526 (16.5)             | 4183 (15.0)                 | 192726 (22.4)                                       |
| <i>Q5 (highest)</i>             | 3971 (9.3)                         | 1148 (20.4)             | 852 (16.6)                | 1387 (9.1)              | 2342 (8.4)                  | 166173 (19.4)                                       |
| <i>Unknown</i>                  | 1499 (3.5)                         | 159 (2.8)               | 95 (1.8)                  | 503 (3.3)               | 214 (0.8)                   | 12842 (1.5)                                         |
| <b>Of the newborn infant</b>    |                                    |                         |                           |                         |                             |                                                     |
| Female sex                      | 20519 (48.3)                       | 2703 (48.1)             | 2444 (47.5)               | 7381 (48.3)             | 13491 (48.3)                | 418726 (48.8)                                       |
| Twin births                     | 901 (2.1)                          | 156 (2.8)               | 105 (2.0)                 | 286 (1.9)               | 554 (2.0)                   | 29075 (3.4)                                         |

SD Standard deviation

Figure 1. Rate and crude (red circles) and adjusted (black squares) relative risk of preterm birth (PTB) without severe small for gestational age (SGA [upper]), SGA without PTB (middle), and PTB with SGA (PTB-SGA [lower]) for liveborn infants of East Asian-born mothers. Relative risks were adjusted for maternal age (< 20, 20–34, ≥ 35 years), parity (0, 1, 2, 3, ≥ 4), marital status (married/common-law, unmarried, unknown), residential income quintile (Q1 [lowest] to Q5 [highest], unknown), infant sex, and twin birth.

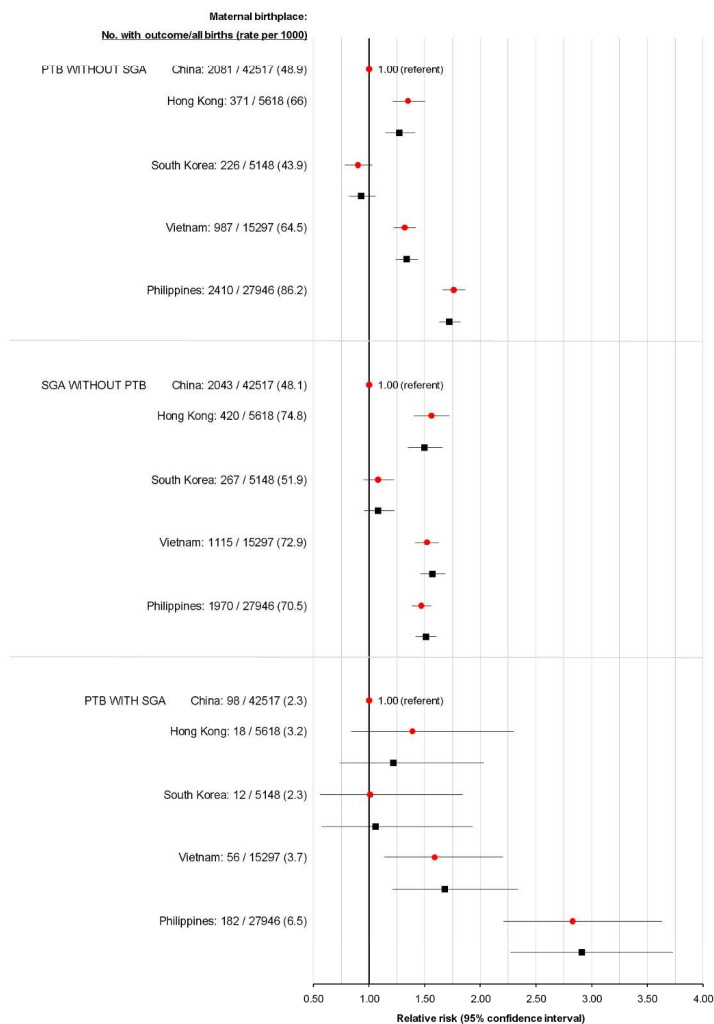

Figure 1. Rate and crude (red circles) and adjusted (black squares) relative risk of preterm birth (PTB) without severe small for gestational age (SGA [upper]), SGA without PTB (middle), and PTB with SGA (PTB-SGA [lower]) for liveborn infants of East Asian-born mothers. Relative risks were adjusted for maternal age (< 20, 20–34, ≥ 35 years), parity (0, 1, 2, 3, ≥ 4), marital status (married/common-law, unmarried, unknown), residential income quintile (Q1 [lowest] to Q5 [highest], unknown), infant sex, and twin birth.

279x361mm (300 x 300 DPI)

Figure 2. Rate and adjusted relative risk of preterm birth (PTB) with severe small for gestational age (SGA) – PTB-SGA – for liveborn infants of East Asian-born mothers, stratified by age (upper two plots) and parity (lower two plots). Relative risks were adjusted for maternal age (< 20, 20–34, ≥ 35 years), parity (0, 1, 2, 3, ≥ 4), marital status (married/common-law, unmarried, unknown), residential income quintile (Q1 [lowest] to Q5 [highest], unknown), infant sex, and twin birth.

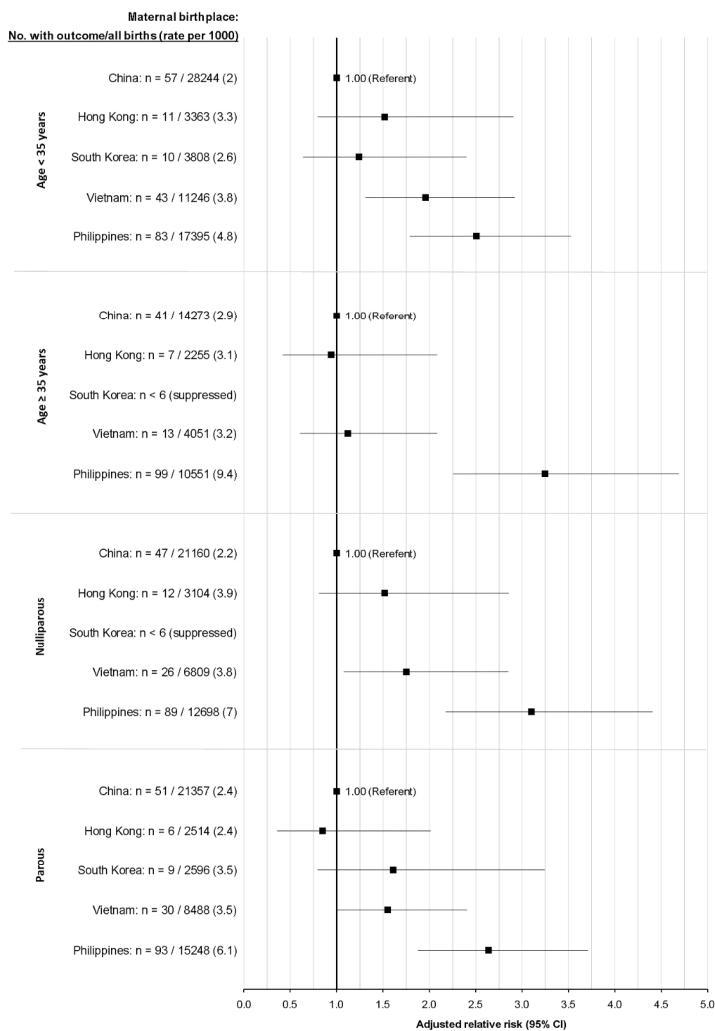

Figure 2. Rate and adjusted relative risk of preterm birth (PTB) with severe small for gestational age (SGA) – PTB-SGA – for liveborn infants of East Asian-born mothers, stratified by age (upper two plots) and parity (lower two plots). Relative risks were adjusted for maternal age (< 20, 20–34, ≥ 35 years), parity (0, 1, 2, 3, ≥ 4), marital status (married/common-law, unmarried, unknown), residential income quintile (Q1 [lowest] to Q5 [highest], unknown), infant sex, and twin birth.

279x361mm (300 x 300 DPI)



Supplementary file 1. Rate and crude (red circles) and adjusted (black squares) relative risk of preterm birth with severe small for gestational age birthweight for liveborn singleton infants of East Asian-born mothers. Relative risks were adjusted for maternal age (< 20, 20–34, ≥ 35 years), parity (0, 1, 2, 3, ≥ 4), marital status (married/common-law, unmarried, unknown), residential income quintile (Q1 [lowest] to Q5 [highest], unknown) and infant sex.

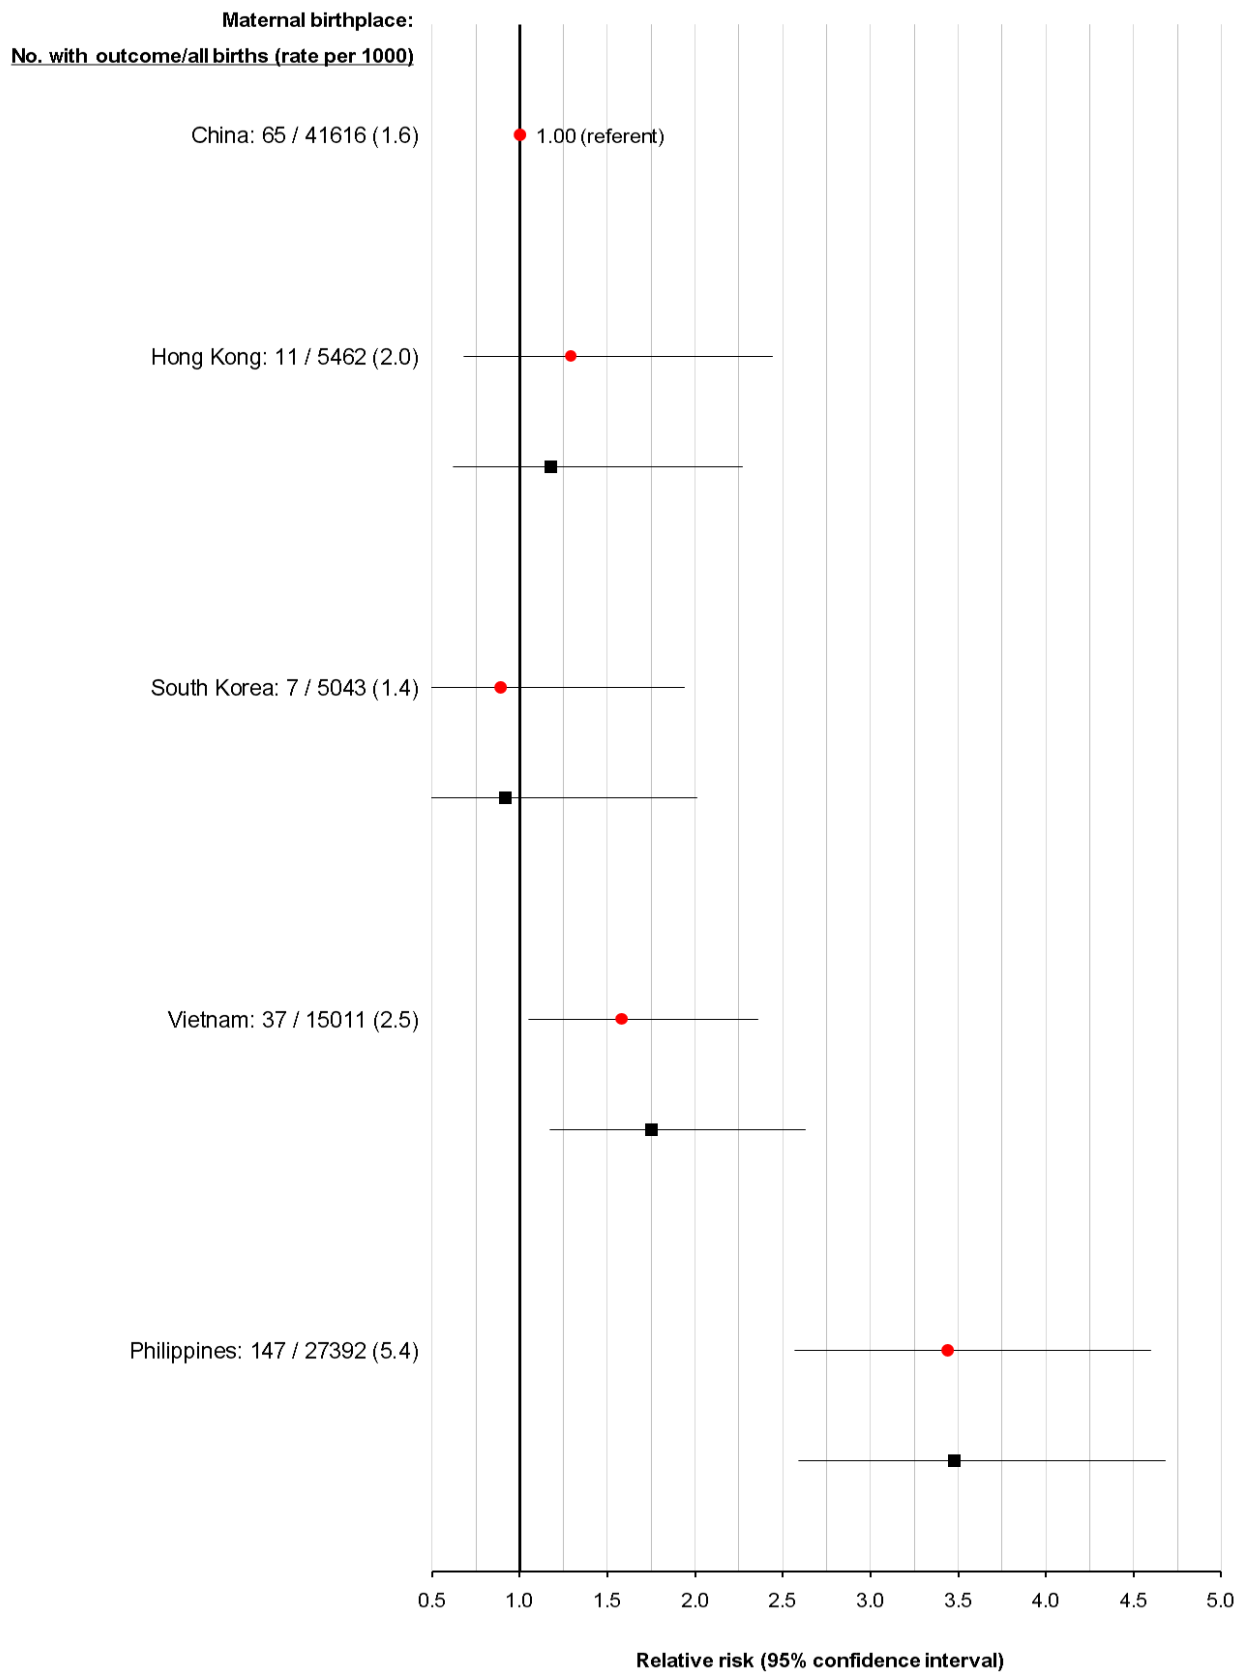

Supplementary file 2. Rate and crude (red circles) and adjusted (black squares) relative risk of preterm birth with severe small for gestational age birthweight for liveborn infants of East Asian-born mothers, each compared to Canadian-born mothers. Relative risks were adjusted for maternal age (< 20, 20–34, ≥ 35 years), parity (0, 1, 2, 3, ≥ 4), marital status (married/common-law, unmarried, unknown), residential income quintile (Q1 [lowest] to Q5 [highest], unknown), infant sex, and twin birth.

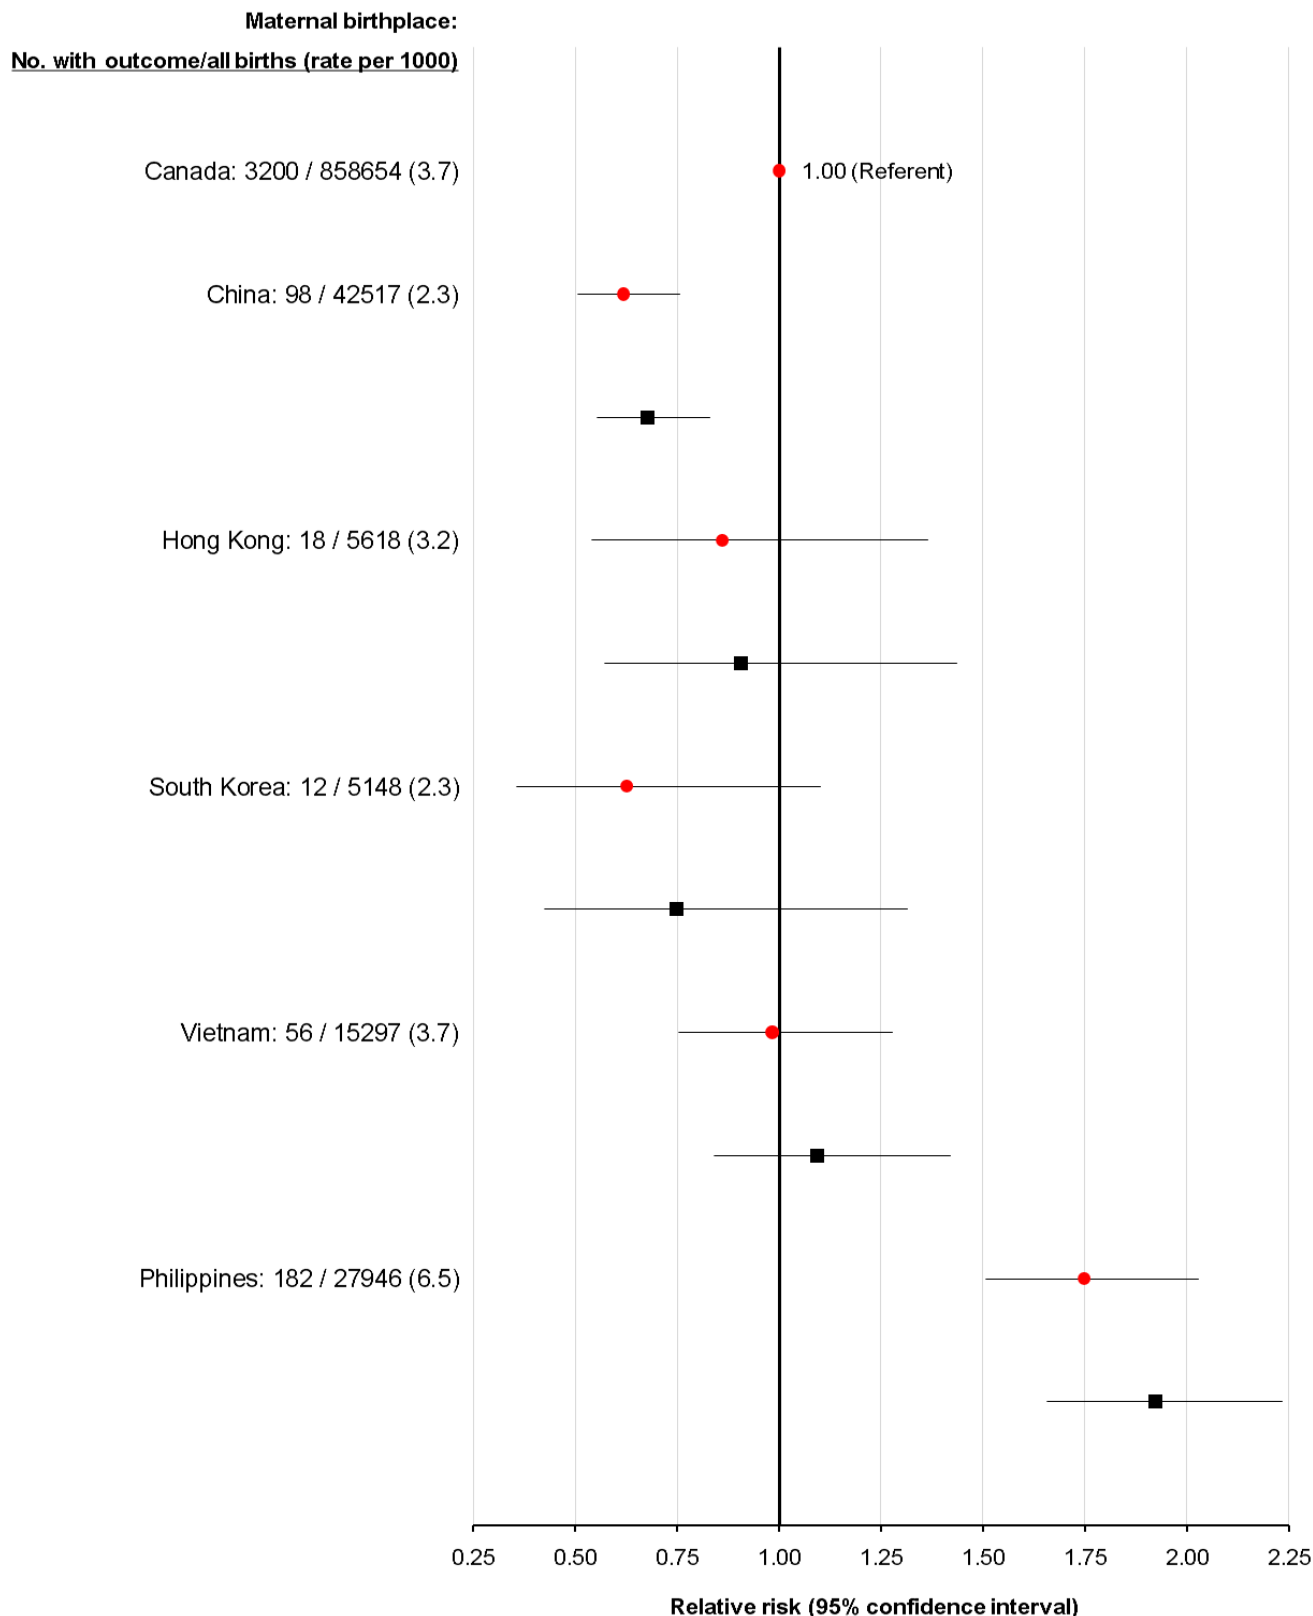

# BMJ Open

## Concomitant preterm birth and severe small-for-gestational age birthweight among infants of immigrant mothers in Ontario originating from the Philippines and East Asia: a population-based study

|                                 |                                                                                                                                                                                                                                                                                                       |
|---------------------------------|-------------------------------------------------------------------------------------------------------------------------------------------------------------------------------------------------------------------------------------------------------------------------------------------------------|
| Journal:                        | <i>BMJ Open</i>                                                                                                                                                                                                                                                                                       |
| Manuscript ID                   | bmjopen-2016-015386.R2                                                                                                                                                                                                                                                                                |
| Article Type:                   | Research                                                                                                                                                                                                                                                                                              |
| Date Submitted by the Author:   | 25-May-2017                                                                                                                                                                                                                                                                                           |
| Complete List of Authors:       | Bartsch, Emily; St. Michael's Hospital, Li Ka Shing Knowledge Institute Park, Alston<br>Jairam, Jennifer; St. Michael's Hospital, University of Toronto, Medicine, and Obstetrics and Gynecology<br>Ray, Joel; St. Michael's Hospital, University of Toronto, Medicine, and Obstetrics and Gynecology |
| <b>Primary Subject Heading</b>: | Obstetrics and gynaecology                                                                                                                                                                                                                                                                            |
| Secondary Subject Heading:      | Paediatrics                                                                                                                                                                                                                                                                                           |
| Keywords:                       | OBSTETRICS, Ethnicity, Preterm birth                                                                                                                                                                                                                                                                  |
|                                 |                                                                                                                                                                                                                                                                                                       |

SCHOLARONE™  
Manuscripts

1  
2  
3 **Concomitant preterm birth and severe small-for-gestational age birthweight**  
4 **among infants of immigrant mothers in Ontario originating from the Philippines and East**  
5 **Asia: a population-based study**  
6  
7

8 Emily Bartsch, BMSc  
9 University of Toronto  
10 Toronto, Ontario, Canada  
11

12  
13 Alison L. Park, MSc  
14 Institute for Clinical Evaluative Sciences  
15 Toronto, Ontario, Canada  
16

17  
18 Jennifer Jairam, MSc PhD(c)  
19 University of Toronto  
20 Toronto, Ontario, Canada  
21

22  
23 Joel G. Ray, MD MSc  
24 Departments of Medicine, Health Policy Management and Evaluation,  
25 and Obstetrics and Gynecology  
26 St. Michael's Hospital, University of Toronto  
27 Toronto, Ontario, Canada  
28  
29

30  
31  
32  
33 **Corresponding author:**

34 Joel G Ray  
35 Department of Medicine, St. Michael's Hospital  
36 30 Bond Street  
37 Toronto, Ontario  
38 M5B 1W8  
39 Tel: (416) 864-6060, Ext 77442  
40 Fax : (416) 864-5485  
41 e-mail: rayj@smh.ca  
42  
43  
44  
45  
46  
47  
48  
49  
50  
51  
52  
53  
54  
55

56 **Text word count:** 1789

57 **Abstract word count:** 246  
58  
59  
60

## Abstract

**Objectives:** Women from the Philippines form one of the largest immigrant groups to North America. Their newborns experience higher rates of preterm birth (PTB), and separately, small-for-gestational age (SGA) birthweight, compared to other East Asians. It is not known if Filipina women are at elevated risk of concomitant PTB and severe SGA (PTB-SGA), a pathological state likely reflective of placental dysfunction and neonatal morbidity.

**Methods:** We conducted a population-based study of all singleton or twin livebirths in Ontario, from 2002 to 2011, among immigrant mothers from the Philippines (N = 27,946), Vietnam (N = 15,297), Hong Kong (N = 5618), South Korea (N = 5148) and China (N = 42,517). We used modified Poisson regression to generate relative risks (RR) of PTB-SGA, defined as a birth < 37 weeks' gestation and a birthweight < 5<sup>th</sup> percentile. RRs were adjusted for maternal age, parity, marital status, income quintile, infant sex and twin births.

**Results:** Relative to mothers from China (2.3 per 1000), the rate of PTB-SGA was significantly higher among infants of mothers from the Philippines (6.5 per 1000; RR 2.91, 95% CI 2.27-3.73), and those from Vietnam (3.7 per 1000; RR 1.68, 95% CI 1.21-2.34). The RR of PTB-SGA was not higher for infants of mothers from Hong Kong or South Korea.

**Interpretation:** Among infants born to immigrant women from five East Asian birthplaces, the risk of PTB-SGA was highest among those from the Philippines. These women and their fetuses may require additional monitoring and interventions.

**Keywords:** Preterm birth; small for gestational age birthweight; ethnicity; race; immigrant; East Asia; Philippines; Filipina; Viet Nam.

**Article summary: Strengths and limitations of this study**

- We conducted a population-based study of all livebirths in Ontario, capturing the entire population of immigrants to Ontario who have birth between 2002 and 2011.
- We accounted for some risk factors for preterm birth (PTB) and small-for-gestational age birthweight (SGA), such as maternal age, infant sex, parity, income level and marital status.
- We lacked data on skillset and level of education at immigration, immigration class, and duration of residence at the time of the index birth.
- We also did not possess information on parental height or weight – which may influence newborn weight.
- We excluded stillbirths, who are potentially the most pathological group of fetuses, and who are at risk of PTB-SGA.

## Background

A pregnancy resulting in a preterm birth (PTB) and concomitant small for gestational age birthweight (SGA) – “PTB-SGA” – is thought to be most pathological, in terms of both being due to placental dysfunction<sup>1 2</sup> and their adverse sequelae for the newborn infant<sup>3 4</sup>. Relative to infants born either PTB alone or SGA alone, those affected by PTB-SGA are 15 times more likely to die in the first month of life<sup>3</sup>.

PTB<sup>5</sup> and SGA<sup>6</sup> are each more frequent in women from the Philippines. Chronic hypertension<sup>7</sup> and preterm onset of preeclampsia<sup>8</sup> are each risk factors for provider-initiated (“iatrogenic”) PTB and SGA, and they are significantly more likely to present in Filipina women than Caucasian or other East Asian women. What remains unknown is whether the risk of PTB-SGA is higher among Filipina women than their counterparts from other East Asian regions.

Herein, we performed a study in Ontario, Canada, where foreign-born individuals comprise 20% of the population and nearly 35% of all births, the highest proportion of G8 countries.<sup>9</sup> We compared the risk of PTB-SGA among five East Asian groups, using a < 5<sup>th</sup> percentile cut-off to define severe SGA, which is more predictive of adverse perinatal outcomes than a < 10<sup>th</sup> percentile cut-off<sup>10</sup>.

## Methods

### *Study sample*

This population-based study comprised all live singletons and twin births in Ontario between 2002 and 2011. Data were retrieved from livebirth records provided by Vital Statistics. We excluded stillbirths, as information on parental place of birth is missing for 12% of records<sup>11</sup>. As all records were de-identified, a given woman may have contributed more than one birth during the study period, but we adjusted for parity, as described below. All pregnancy and newborn care is universally covered under Ontario’s Health Insurance Plan. Approximately 95% of Ontarian women undergo prenatal ultrasonography before 20 weeks gestation, enhancing accuracy of gestational age determined at birth.<sup>12</sup>

### *Exposures and outcomes*

The main exposure was maternal place of birth, which was self-reported on the infant's birth record. Each newborn was then assigned to one of five maternal East Asian birthplaces: (1) China (the referent), (2) Hong Kong, (3) South Korea, (4) Vietnam, and (5) the Philippines. Women from China were chosen as the reference group as they are the largest East Asian immigrant group in Ontario<sup>9</sup>, and are have relatively lower rates of PTB and SGA<sup>5,6</sup>. The main study outcome was PTB-SGA, defined as PTB < 37 weeks and severe SGA < 5<sup>th</sup> percentile<sup>10</sup>. The birthweight percentile curves used herein were those for all livebirths in Ontario, and were not otherwise customized by maternal ethnicity or other factors (6,11). Reasons for the latter were that we restricted our cohort solely to births of East Asian mothers, and that defining severe SGA at < 5<sup>th</sup> percentile is a cut-off that reflects pathological intrauterine growth restriction (10). Secondary outcomes were PTB without severe SGA, and severe SGA without PTB.

### *Data analysis*

We used modified Poisson regression models to estimate relative risks (RR) and 95% confidence intervals (CI) for each study outcome in association with maternal place of birth. RR were adjusted for maternal age (< 20, 20–34, ≥ 35 years), parity (0, 1, 2, 3, ≥ 4), marital status (married/common-law, unmarried, unknown), residential income quintile (Q1 [lowest] to Q5 [highest], unknown)<sup>13</sup>, infant sex, and twin births. The “unknown” categories of marital status and residential income quintile were included in the multivariable models. However, for maternal age and parity, we excluded those pregnancies with “unknown” status, given the rarity of this situation and the need to allow model convergence, accordingly.

For the main outcome of PTB-SGA, we additionally performed stratified analyses to examine potential effect measure modification by parity (nulliparous vs. parous) and by maternal age (< 35 years vs. ≥ 35 years).

As the study focus was to compare immigrants from different East Asian birthplaces, Canadian-born mothers were not included in main regression models. However, for comparative purposes, we described the characteristics of Canadian-born mothers and their



1  
2  
3 infants, and ran an additional analysis of the main model of PTB-SGA with Canadian-born  
4 mothers as the referent.  
5

6  
7 Statistical analyses were performed using SAS 9.4 (SAS Institute Inc., Cary NC). Ethics approval  
8 was provided by the Research Ethics Board of St. Michael's Hospital, Toronto, Ontario.  
9

## 10 11 12 **Results**

13  
14 Between 2002 and 2011, there were 956,994 liveborn singleton or twin births in Ontario to  
15 mothers born in Canada, China, Hong Kong, South Korea, Vietnam or the Philippines. We  
16 excluded 893 infants (0.09%) whose gestational age was < 24 or > 42 weeks, and 487 infants  
17 (0.05%) whose gestational age at birth was unknown. We further excluded infants whose  
18 birthweight was unknown (n = 31) or < 500 g (n = 55), whose sex was unknown (n = 1), or in  
19 which maternal age (n = 108) or parity (n = 239) were unknown.  
20  
21

22 The final cohort comprised 42,517 births to mothers from China, 5,618 from Hong Kong, 5,148  
23 from South Korea, 15,297 from Vietnam, and 27,946 from the Philippines. The remainder were  
24 newborns of mothers from Canada (Table 1). In general, mothers from East Asia tended to be  
25 older than Canadian-born women, but of similar parity. Filipina-born mothers were similar in  
26 age, marital status and income to Chinese-born mothers (Table 1).  
27  
28

29 Compared to mothers from China, the outcomes of PTB without severe SGA, and severe SGA  
30 without PTB, were significantly more prevalent among newborns of mothers from Hong Kong,  
31 Vietnam and the Philippines, but not South Korea (Figure 1). The more severe outcome of PTB-  
32 SGA was significantly more common among newborns of mothers from Vietnam (3.7 per 1000;  
33 aRR 1.68 95% CI 1.21 to 2.34), compared to those of mothers from China (2.3 per 1000) (Figure  
34 1). For newborns of Filipina women, the rate (6.5 per 1000) and aRR (2.91, 95% CI 2.27 to 3.73)  
35 were even higher (Figure 1).  
36  
37

38 In our stratified analyses, the risk of PTB-SGA was somewhat more pronounced among Filipina  
39 women aged  $\geq 35$  years or older (Figure 2, upper) and those who were nulliparous (Figure 2,  
40 lower).  
41  
42

43 Limiting the dataset to singleton births did not appreciably change the RR of PTB-SGA, even  
44 heightening the RR among Filipina women (Supplementary file 1).  
45  
46  
47  
48  
49  
50  
51  
52  
53

1  
2  
3 Re-running the main model of PTB-SGA, with Canadian-born mothers as the referent, showed  
4 that only the offspring of Filipina mothers were at higher risk of PTB-SGA (Supplementary file  
5 2).  
6  
7  
8  
9

## 10 Interpretation

11 Newborns of mothers from the Philippines were most vulnerable to PTB-SGA, especially  
12 among women  $\geq 35$  years, who comprised 37% of all Filipina mothers, and in whom the rate of  
13 PTB-SGA was nearly 1%.  
14  
15  
16  
17  
18  
19

## 20 *Strengths and limitations*

21 We evaluated nearly 100,000 livebirths among women born in five East Asian regions, which  
22 are major sources of immigrants to Ontario, in a setting of universal healthcare. Infants of  
23 Chinese-born women provided an ideal reference group, as China is the largest source of  
24 immigrants from East Asia to Ontario, and they have a low incidence of adverse neonatal and  
25 maternal outcomes<sup>5, 14</sup>. The  $< 5^{\text{th}}$  percentile cut-off used to define severe SGA reflects a degree  
26 of smallness that is more likely to be pathological, rather than constitutional<sup>10</sup>. Still, the  
27 outcome of PTB-SGA was not rare – occurring in 6.5 per 1000 infants of Filipina mothers.  
28 Through our analysis, we were able to account for some previously noted risk factors for PTB or  
29 SGA, such as maternal age, infant sex, parity, income level and marital status.  
30  
31  
32  
33  
34  
35  
36  
37  
38

39 A limitation of this study was the exclusion of stillbirths, who are potentially the most  
40 pathological group of fetuses, and who are at risk of PTB-SGA<sup>15, 16</sup>. We lacked data on factors  
41 associated with the so-called “healthy immigrant effect”<sup>17</sup>, such as skillset and level of  
42 education at immigration, immigration class, and duration of residence at the time of the index  
43 birth. We also did not possess information on parental height or weight – which may influence  
44 newborn weight – or conditions such as maternal chronic hypertension and diabetes mellitus,  
45 or maternal behavioural risk factors (e.g. smoking, drug or substance use). However, Filipina  
46 women of reproductive age living in Canada have a rate of smoking under 6.0%, comparable to  
47 that of their East Asian counterparts<sup>7</sup>, and the corresponding rate in pregnancy would be  
48 expected to be even lower. The body mass index (BMI) of Filipina women of reproductive age  
49 tends to be higher than that of other East Asians<sup>7</sup>. It is unlikely that access to prenatal care  
50  
51  
52  
53  
54  
55  
56  
57  
58  
59  
60

1  
2  
3 explains the current findings, as 88% of Filipina women and 85% of other East Asian women in  
4 Canada have a regular medical doctor<sup>7</sup>. Finally, we could not identify the specific causes of PTB-  
5 SGA from the dataset used herein, which is certainly worthy of a focused study focused on  
6 differentiating spontaneous vs. provider-initiated PTB.  
7  
8  
9

### 10 11 12 *Implications*

13  
14 In 2011, 13.1% of all newcomers to Canada were from the Philippines<sup>9</sup>. Women from the  
15 Philippines were at exceptionally high risk of PTB-SGA, peaking at nearly 1% among those aged  
16 35 years and older, and who represent one-third of all Filipina women giving birth in Ontario.  
17 From a public health perspective, there is value in reducing the incidence of PTB-SGA, and such  
18 a strategy might start with Filipina women. For healthcare providers – including family doctors,  
19 obstetricians, or midwives – the priority would be to address risk factors in these women. This  
20 can be done at several time points – before becoming pregnant, during pregnancy, and at the  
21 time of delivery. Before pregnancy, providers can counsel Filipina women, especially those  
22 women older than 35 years of age, on the possibility of adverse perinatal outcomes. During the  
23 pregnancy, risk factors can be identified and managed. Chronic hypertension is one important  
24 risk factor for both PTB<sup>18</sup> and SGA<sup>19 20</sup>, and also for preeclampsia<sup>21</sup>, which can give rise to PTB-  
25 SGA<sup>22</sup>. Chronic hypertension is highly prevalent among Filipina women in Ontario<sup>7</sup>; therefore,  
26 efforts to regulate blood pressure and prevent preeclampsia may help reduce the risk of SGA-  
27 PTB among Filipina women, and also those from Vietnam. Such interventions include aspirin<sup>23-25</sup>  
28 and early pregnancy blood pressure assessments<sup>26</sup>. By the third trimester of pregnancy,  
29 periodic sonographic assessment of fetal growth and well-being should be considered, as there  
30 is evidence that this helps the clinician identify SGA infants and balance the risks of prematurity  
31 against a worsening intrauterine environment<sup>27 28</sup>.  
32  
33  
34  
35  
36  
37  
38  
39  
40  
41  
42  
43  
44  
45  
46  
47  
48

### 49 50 **Conclusions**

51  
52 What differentiates a Filipina woman from another East Asian woman is her heightened risk  
53 of having a liveborn affected by PTB-SGA, a severe pathological state. For Filipina immigrant  
54 women, appropriate cautionary measures should be taken to ensure that mother and baby  
55  
56  
57  
58  
59  
60

1  
2  
3 remain healthy throughout the pregnancy and delivery. Future research should aim to identify  
4 specific, and ideally modifiable, traits of Filipina women that increase the risk of PTB-SGA during  
5 pregnancy. Specifically, it would be worthwhile to evaluate whether the rates of smoking, high  
6 BMI, or other socioeconomic indicators differ between pregnant Filipina women and those  
7 women from other East Asian birthplaces.  
8  
9  
10  
11  
12  
13

14 **Authors contributions:** Bartsch contributed to the study concept, analysis and interpretation of  
15 the data, drafting of manuscript, manuscript revision and approval of final version. Ray  
16 contributed to the study concept, analysis and interpretation of the data, drafting of  
17 manuscript, manuscript revision, and approval of final version. Park contributed to the analysis  
18 and interpretation of the data, drafting of manuscript, manuscript revision, and approval of  
19 final version. Jairam contributed to the interpretation of the data and approval of final version.  
20  
21  
22  
23  
24  
25  
26  
27

28 **Data sharing statement:** No additional data available.  
29  
30  
31

32 **Details of ethics approval:** Ethics approval was granted by the Research Ethics Board of St.  
33 Michael's Hospital in Toronto, Ontario, Canada.  
34  
35  
36

37 **Funding statement:** This work was supported by a grant from the Canadian Institutes of Health  
38 Research (CIHR). JGR holds a Canadian Institutes for Health Research Chair in Reproductive and  
39 Child Health Services and Policy Research, co-funded by the SickKids Foundation.  
40  
41  
42  
43  
44

45 **Competing interests:** None.  
46  
47  
48  
49  
50  
51  
52  
53  
54  
55  
56  
57  
58  
59  
60

**FIGURE LEGENDS**

Figure 1. Rate and crude (red circles) and adjusted (black squares) relative risk of preterm birth (PTB) without severe small for gestational age (SGA [upper]), SGA without PTB (middle), and PTB with SGA (PTB-SGA [lower]) for liveborn infants of East Asian-born mothers. Relative risks were adjusted for maternal age (< 20, 20–34, ≥ 35 years), parity (0, 1, 2, 3, ≥ 4), marital status (married/common-law, unmarried, unknown), residential income quintile (Q1 [lowest] to Q5 [highest], unknown), infant sex, and twin birth.

Figure 2. Rate and adjusted relative risk of preterm birth (PTB) with severe small for gestational age (SGA) – PTB-SGA – for liveborn infants of East Asian-born mothers, stratified by age (upper two plots) and parity (lower two plots). Relative risks were adjusted for maternal age (< 20, 20–34, ≥ 35 years), parity (0, 1, 2, 3, ≥ 4), marital status (married/common-law, unmarried, unknown), residential income quintile (Q1 [lowest] to Q5 [highest], unknown), infant sex, and twin birth.

## References

1. Salafia CM, Minior VK, Pezzullo JC, et al. Intrauterine growth restriction in infants of less than thirty-two weeks' gestation: associated placental pathologic features. *Am J Obstet Gynecol* 1995;173(4):1049-57.
2. Ananth CV, Vintzileos AM. Ischemic placental disease: Epidemiology and risk factors. *Eur J Obstet Gynecol Reprod Biol* 2011;159(1):77-82.
3. Katz J, Lee AC, Kozuki N, et al. Mortality risk in preterm and small-for-gestational-age infants in low-income and middle-income countries: a pooled country analysis. *Lancet* 2013;382(9890):417-25. doi: 10.1016/s0140-6736(13)60993-9
4. Goldenberg RL, Hauth JC, Andrews WW. Intrauterine infection and preterm delivery. *N Engl J Med* 2000;342(20):1500-7. doi: 10.1056/nejm200005183422007
5. Park AL, Urquia ML, Ray JG. Risk of Preterm Birth According to Maternal and Paternal Country of Birth: A Population-Based Study. *J Obstet Gynaecol Can* 2015;37(12):1053-62.
6. De Souza LR, Urquia ML, Sgro M, et al. One size does not fit all: differences in newborn weight among mothers of Philippine and other East Asian origin. *J Obstet Gynaecol Can* 2012;34(11):1026-37.
7. Fuller-Thomson E, Rotermann M, Ray JG. Elevated risk factors for adverse pregnancy outcomes among Filipina-Canadian women. *J Obstet Gynaecol Can* 2010;32(2):113-9.
8. Ray JG, Wanigaratne S, Park AL, et al. Preterm preeclampsia in relation to country of birth. *J Perinatol* 2016;36(9):718-22. doi: 10.1038/jp.2016.73
9. Immigration and Ethnocultural Diversity in Canada: Statistics Canada; 2013 [Available from: <https://www12.statcan.gc.ca/nhs-enm/2011/as-sa/99-010-x/99-010-x2011001-eng.cfm>], accessed August 3, 2016.
10. Zhang J, Mikolajczyk R, Grewal J, et al. Prenatal application of the individualized fetal growth reference. *Am Journal Epidemiol* 2011;173(5):539-43. doi: 10.1093/aje/kwq411
11. Bartsch E, Park AL, Pulver AJ, et al. Maternal and paternal birthplace and risk of stillbirth. *J Obstet Gynaecol Can* 2015;37(4):314-23.
12. Ray JG, Vermeulen MJ, Schull MJ, et al. Results of the recent immigrant pregnancy and perinatal long-term evaluation study (RIPPLES). *CMAJ* 2007;176(10):1419-26.
13. Wilkins R, Peters PA. Postal code conversion file, PCCF+ version 5K Health Analysis Division: Statistics Canada; 2012 [Available from: <http://www5.statcan.gc.ca/olc-olc/action?ObjId=92-154-X&ObjType=2&lang=en&limit=0>], accessed August 3, 2016.
14. Mukerji G, Chiu M, Shah BR. Gestational diabetes mellitus and pregnancy outcomes among Chinese and South Asian women in Canada. *J Matern Fetal Neonatal Med* 2013;26(3):279-84. doi: 10.3109/14767058.2012.735996
15. Flenady V, Koopmans L, Middleton P, et al. Major risk factors for stillbirth in high-income countries: a systematic review and meta-analysis. *Lancet* 2011;377(9774):1331-40. doi: 10.1016/s0140-6736(10)62233-7
16. Mullan Z, Horton R. Bringing stillbirths out of the shadows. *Lancet* 2011;377(9774):1291-2. doi: 10.1016/s0140-6736(11)60098-6
17. McDonald JT, Kennedy S. Insights into the 'healthy immigrant effect': health status and health service use of immigrants to Canada. *Soc Sci Med* 2004;59(8):1613-27. doi: 10.1016/j.socscimed.2004.02.004

18. Tucker CM, Berrien K, Menard MK, et al. Predicting Preterm Birth Among Women Screened by North Carolina's Pregnancy Medical Home Program. *Matern Child Health J* 2015;19(11):2438-52. doi: 10.1007/s10995-015-1763-5
19. Catov JM, Nohr EA, Olsen J, et al. Chronic hypertension related to risk for preterm and term small for gestational age births. *Obstet Gynecol* 2008;112(2 Pt 1):290-6. doi: 10.1097/AOG.0b013e31817f589b
20. Zetterstrom K, Lindeberg SN, Haglund B, et al. Chronic hypertension as a risk factor for offspring to be born small for gestational age. *Acta Obstetrica et Gynecologica Scandinavica* 2006;85(9):1046-50.
21. Bartsch E, Medcalf KE, Park AL, et al. Clinical risk factors for pre-eclampsia determined in early pregnancy: systematic review and meta-analysis of large cohort studies. *BMJ* 2016;353:i1753. doi: 10.1136/bmj.i1753
22. Sibai B, Dekker G, Kupferminc M. Pre-eclampsia. *Lancet* 2005;365(9461):785-99. doi: 10.1016/s0140-6736(05)17987-2
23. Lausman A, Kingdom J, Gagnon R, et al. Intrauterine growth restriction: screening, diagnosis, and management. *J Obstet Gynaecol Can* 2013;35(8):741-57.
24. Henderson JT, Whitlock EP, O'Conner E, et al. Low-Dose Aspirin for the Prevention of Morbidity and Mortality From Preeclampsia: A Systematic Evidence Review for the US Preventive Services Task Force. *Rockville (MD): Agency for Healthcare Research and Quality (US)* 2014;Report No.: 14-05207-EF-1.
25. National Collaborating Centre for Women's and Children's Health (UK). Hypertension in Pregnancy: The Management of Hypertensive Disorders During Pregnancy. *National Institute for Health and Clinical Excellence: Guidance. London: RCOG Press* 2010.
26. Kuc S, Koster MP, Franx A, et al. Maternal characteristics, mean arterial pressure and serum markers in early prediction of preeclampsia. *PloS one* 2013;8(5):e63546. doi: 10.1371/journal.pone.0063546
27. Hecher K, Bilardo CM, Stigter RH, et al. Monitoring of fetuses with intrauterine growth restriction: a longitudinal study. *Ultrasound Obstet Gynecol* 2001;18(6):564-70. doi: 10.1046/j.0960-7692.2001.00590.x
28. Nguyen PH, Addo OY, Young M, et al. Patterns of Fetal Growth Based on Ultrasound Measurement and its Relationship with Small for Gestational Age at Birth in Rural Vietnam. *Paediatrics Perinat Epidemiol* 2016;30(3):256-66. doi: 10.1111/ppe.12276

Table 1. Characteristics of live singleton and twin births and their mothers, who delivered at 24 to 42 weeks' gestation in Ontario, 2002 to 2011. All data are presented as a number (%) unless otherwise indicated.

| Characteristic                  | East Asian maternal place of birth |                         |                           |                         |                             | Canadian maternal country of birth<br>(n = 858,654) |
|---------------------------------|------------------------------------|-------------------------|---------------------------|-------------------------|-----------------------------|-----------------------------------------------------|
|                                 | China<br>(n = 42,517)              | Hong Kong<br>(n = 5618) | South Korea<br>(n = 5148) | Vietnam<br>(n = 15,297) | Philippines<br>(n = 27,946) |                                                     |
| <b>Of the mother</b>            |                                    |                         |                           |                         |                             |                                                     |
| Mean (SD) age, years            | 32.3 (4.7)                         | 33.5 (4.3)              | 32.1 (3.9)                | 31.4 (4.8)              | 32.6 (5.4)                  | 29.5 (5.5)                                          |
| Age category, years             |                                    |                         |                           |                         |                             |                                                     |
| < 20                            | 81 (0.2)                           | 17 (0.3)                | 7 (0.1)                   | 68 (0.4)                | 353 (1.3)                   | 38920 (4.5)                                         |
| 20-34                           | 28163 (66.2)                       | 3346 (59.6)             | 3801 (73.8)               | 11178 (73.1)            | 17042 (61.0)                | 662500 (77.2)                                       |
| ≥ 35                            | 14273 (33.6)                       | 2255 (40.1)             | 1340 (26.0)               | 4051 (26.5)             | 10551 (37.8)                | 157234 (18.3)                                       |
| Parity                          | 1 (0-1)                            | 0 (0-1)                 | 1 (0-1)                   | 1 (0-1)                 | 1 (0-1)                     | 1 (0-1)                                             |
| 0                               | 21160 (49.8)                       | 3104 (55.3)             | 2552 (49.6)               | 6809 (44.5)             | 12698 (45.4)                | 389635 (45.4)                                       |
| 1                               | 17836 (42.0)                       | 2023 (36.0)             | 1990 (38.7)               | 5984 (39.1)             | 9905 (35.4)                 | 304847 (35.5)                                       |
| 2                               | 3012 (7.1)                         | 413 (7.4)               | 505 (9.8)                 | 1896 (12.4)             | 3921 (14.0)                 | 111814 (13.0)                                       |
| 3                               | 410 (1.0)                          | 59 (1.1)                | 78 (1.5)                  | 470 (3.1)               | 1047 (3.7)                  | 33591 (3.9)                                         |
| ≥ 4                             | 99 (0.2)                           | 19 (0.3)                | 23 (0.4)                  | 138 (0.9)               | 375 (1.3)                   | 18767 (2.2)                                         |
| Marital status                  |                                    |                         |                           |                         |                             |                                                     |
| <i>Married/common-law</i>       | 36668 (86.2)                       | 5205 (92.6)             | 4829 (93.8)               | 10899 (71.2)            | 22304 (79.8)                | 578402 (67.4)                                       |
| <i>Unmarried</i>                | 3764 (8.9)                         | 236 (4.2)               | 107 (2.1)                 | 2388 (15.6)             | 3125 (11.2)                 | 132698 (15.5)                                       |
| <i>Unknown</i>                  | 2085 (4.9)                         | 177 (3.2)               | 212 (4.1)                 | 2010 (13.1)             | 2517 (9.0)                  | 147554 (17.2)                                       |
| Residential income quintile (Q) |                                    |                         |                           |                         |                             |                                                     |
| <i>Q1 (lowest)</i>              | 12391 (29.1)                       | 512 (9.1)               | 1183 (23.0)               | 4091 (26.7)             | 8992 (32.2)                 | 150194 (17.5)                                       |
| <i>Q2</i>                       | 11092 (26.1)                       | 1119 (19.9)             | 976 (19.0)                | 3454 (22.6)             | 6770 (24.2)                 | 159370 (18.6)                                       |
| <i>Q3</i>                       | 7328 (17.2)                        | 1193 (21.2)             | 1021 (19.8)               | 3336 (21.8)             | 5445 (19.5)                 | 177349 (20.7)                                       |
| <i>Q4</i>                       | 6236 (14.7)                        | 1487 (26.5)             | 1021 (19.8)               | 2526 (16.5)             | 4183 (15.0)                 | 192726 (22.4)                                       |
| <i>Q5 (highest)</i>             | 3971 (9.3)                         | 1148 (20.4)             | 852 (16.6)                | 1387 (9.1)              | 2342 (8.4)                  | 166173 (19.4)                                       |
| <i>Unknown</i>                  | 1499 (3.5)                         | 159 (2.8)               | 95 (1.8)                  | 503 (3.3)               | 214 (0.8)                   | 12842 (1.5)                                         |
| <b>Of the newborn infant</b>    |                                    |                         |                           |                         |                             |                                                     |
| Female sex                      | 20519 (48.3)                       | 2703 (48.1)             | 2444 (47.5)               | 7381 (48.3)             | 13491 (48.3)                | 418726 (48.8)                                       |
| Twin births                     | 901 (2.1)                          | 156 (2.8)               | 105 (2.0)                 | 286 (1.9)               | 554 (2.0)                   | 29075 (3.4)                                         |

SD Standard deviation



Figure 1. Rate and crude (red circles) and adjusted (black squares) relative risk of preterm birth (PTB) without severe small for gestational age (SGA [upper]), SGA without PTB (middle), and PTB with SGA (PTB-SGA [lower]) for liveborn infants of East Asian-born mothers. Relative risks were adjusted for maternal age (< 20, 20–34, ≥ 35 years), parity (0, 1, 2, 3, ≥ 4), marital status (married/common-law, unmarried, unknown), residential income quintile (Q1 [lowest] to Q5 [highest], unknown), infant sex, and twin birth.



Figure 1. Rate and crude (red circles) and adjusted (black squares) relative risk of preterm birth (PTB) without severe small for gestational age (SGA [upper]), SGA without PTB (middle), and PTB with SGA (PTB-SGA [lower]) for liveborn infants of East Asian-born mothers. Relative risks were adjusted for maternal age (< 20, 20–34, ≥ 35 years), parity (0, 1, 2, 3, ≥ 4), marital status (married/common-law, unmarried, unknown), residential income quintile (Q1 [lowest] to Q5 [highest], unknown), infant sex, and twin birth.

279x361mm (300 x 300 DPI)

Figure 2. Rate and adjusted relative risk of preterm birth (PTB) with severe small for gestational age (SGA) – PTB-SGA – for liveborn infants of East Asian-born mothers, stratified by age (upper two plots) and parity (lower two plots). Relative risks were adjusted for maternal age (< 20, 20–34, ≥ 35 years), parity (0, 1, 2, 3, ≥ 4), marital status (married/common-law, unmarried, unknown), residential income quintile (Q1 [lowest] to Q5 [highest], unknown), infant sex, and twin birth.



Figure 2. Rate and adjusted relative risk of preterm birth (PTB) with severe small for gestational age (SGA) – PTB-SGA – for liveborn infants of East Asian-born mothers, stratified by age (upper two plots) and parity (lower two plots). Relative risks were adjusted for maternal age (< 20, 20–34, ≥ 35 years), parity (0, 1, 2, 3, ≥ 4), marital status (married/common-law, unmarried, unknown), residential income quintile (Q1 [lowest] to Q5 [highest], unknown), infant sex, and twin birth.

279x361mm (300 x 300 DPI)

Supplementary file 1. Rate and crude (red circles) and adjusted (black squares) relative risk of preterm birth with severe small for gestational age birthweight for liveborn singleton infants of East Asian-born mothers. Relative risks were adjusted for maternal age (< 20, 20–34, ≥ 35 years), parity (0, 1, 2, 3, ≥ 4), marital status (married/common-law, unmarried, unknown), residential income quintile (Q1 [lowest] to Q5 [highest], unknown) and infant sex.

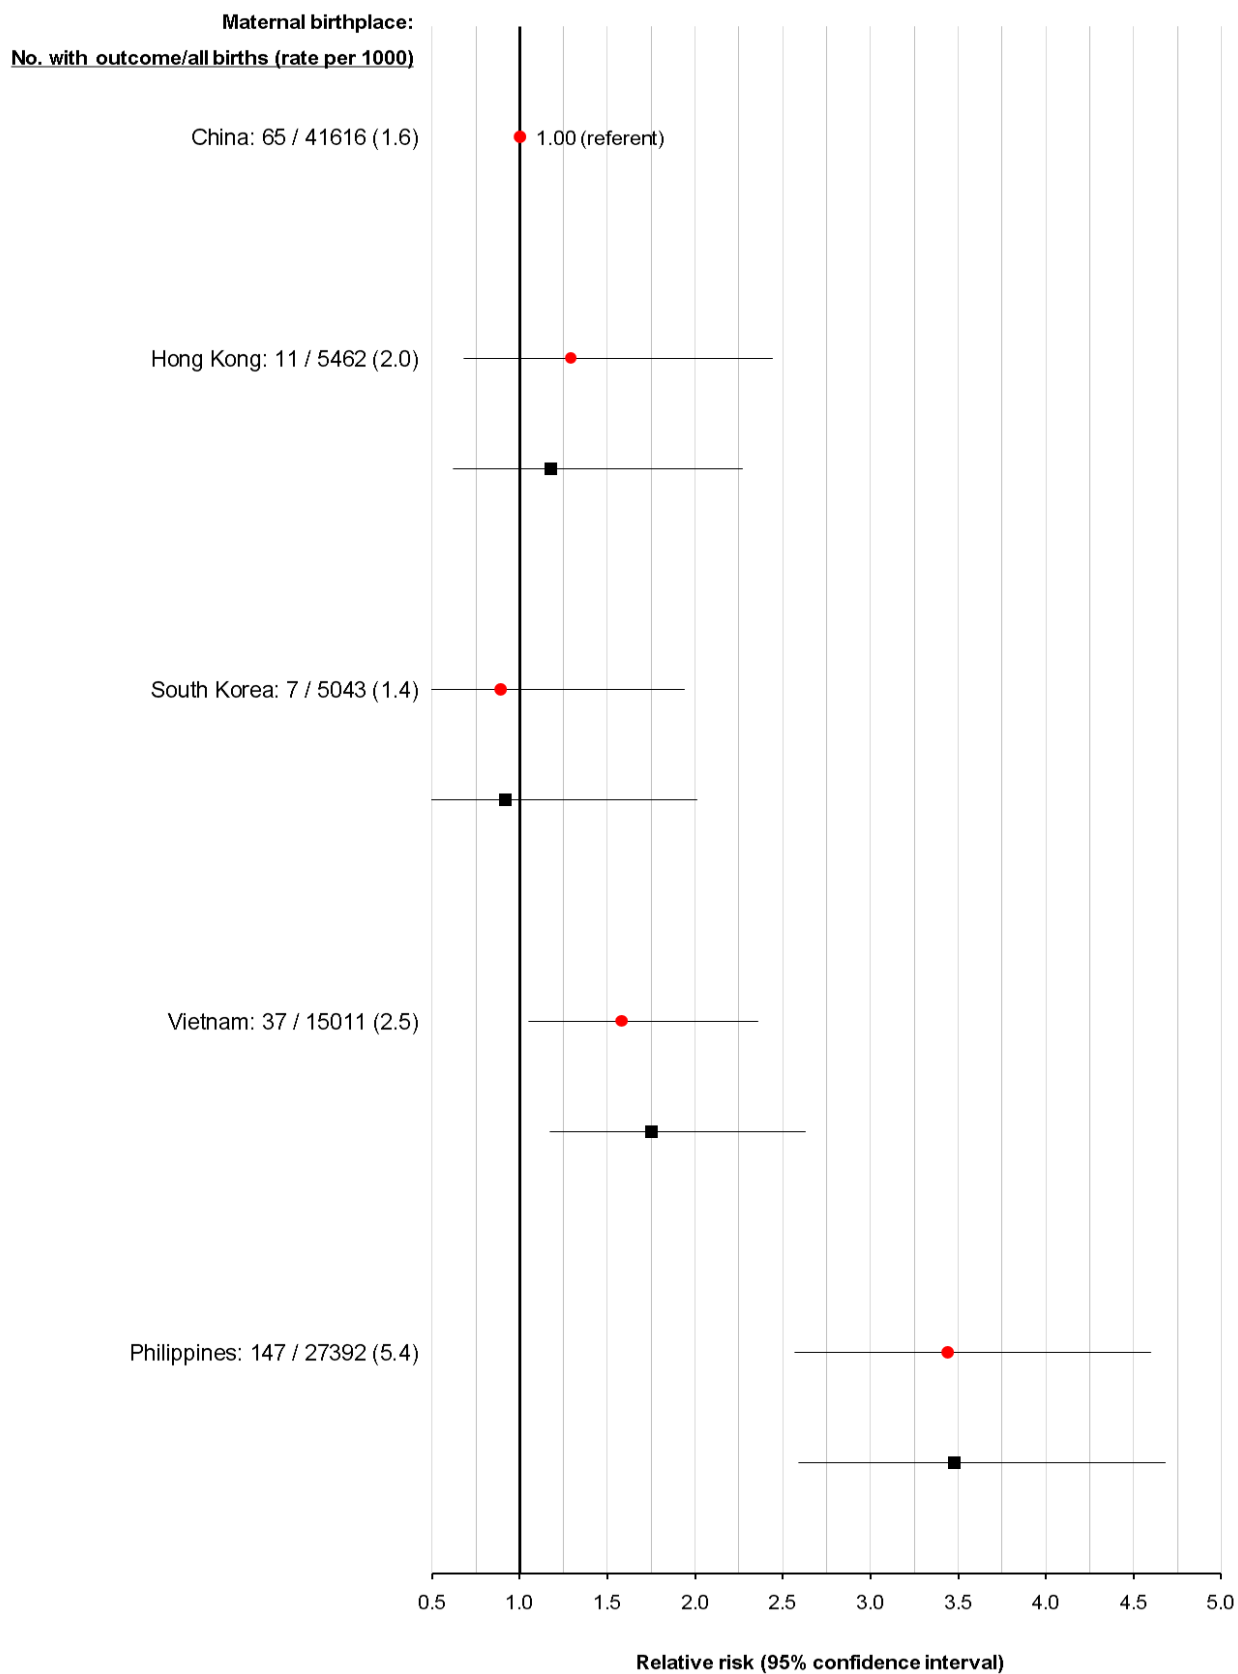

Supplementary file 2. Rate and crude (red circles) and adjusted (black squares) relative risk of preterm birth with severe small for gestational age birthweight for liveborn infants of East Asian-born mothers, each compared to Canadian-born mothers. Relative risks were adjusted for maternal age (< 20, 20–34, ≥ 35 years), parity (0, 1, 2, 3, ≥ 4), marital status (married/common-law, unmarried, unknown), residential income quintile (Q1 [lowest] to Q5 [highest], unknown), infant sex, and twin birth.



# BMJ Open

## Concomitant preterm birth and severe small-for-gestational age birthweight among infants of immigrant mothers in Ontario originating from the Philippines and East Asia: a population-based study

|                                 |                                                                                                                                                                                                                                                                                                       |
|---------------------------------|-------------------------------------------------------------------------------------------------------------------------------------------------------------------------------------------------------------------------------------------------------------------------------------------------------|
| Journal:                        | <i>BMJ Open</i>                                                                                                                                                                                                                                                                                       |
| Manuscript ID                   | bmjopen-2016-015386.R3                                                                                                                                                                                                                                                                                |
| Article Type:                   | Research                                                                                                                                                                                                                                                                                              |
| Date Submitted by the Author:   | 02-Jun-2017                                                                                                                                                                                                                                                                                           |
| Complete List of Authors:       | Bartsch, Emily; St. Michael's Hospital, Li Ka Shing Knowledge Institute Park, Alston<br>Jairam, Jennifer; St. Michael's Hospital, University of Toronto, Medicine, and Obstetrics and Gynecology<br>Ray, Joel; St. Michael's Hospital, University of Toronto, Medicine, and Obstetrics and Gynecology |
| <b>Primary Subject Heading</b>: | Obstetrics and gynaecology                                                                                                                                                                                                                                                                            |
| Secondary Subject Heading:      | Paediatrics                                                                                                                                                                                                                                                                                           |
| Keywords:                       | OBSTETRICS, Ethnicity, Preterm birth                                                                                                                                                                                                                                                                  |
|                                 |                                                                                                                                                                                                                                                                                                       |

SCHOLARONE™  
Manuscripts

1  
2  
3  
4  
5  
6  
7  
8  
9  
10  
11  
12  
13  
14  
15  
16  
17  
18  
19  
20  
21  
22  
23  
24  
25  
26  
27  
28  
29  
30  
31  
32  
33  
34  
35  
36  
37  
38  
39  
40  
41  
42  
43  
44  
45  
46  
47  
48  
49  
50  
51  
52  
53  
54  
55  
56  
57  
58  
59  
60

**Concomitant preterm birth and severe small-for-gestational age birthweight  
among infants of immigrant mothers in Ontario originating from the Philippines and East  
Asia: a population-based study**

Emily Bartsch, BMSc  
University of Toronto  
Toronto, Ontario, Canada

Alison L. Park, MSc  
Institute for Clinical Evaluative Sciences  
Toronto, Ontario, Canada

Jennifer Jairam, MSc PhD(c)  
University of Toronto  
Toronto, Ontario, Canada

Joel G. Ray, MD MSc  
Departments of Medicine, Health Policy Management and Evaluation,  
and Obstetrics and Gynecology  
St. Michael's Hospital, University of Toronto  
Toronto, Ontario, Canada

**Corresponding author:**

Joel G Ray  
Department of Medicine, St. Michael's Hospital  
30 Bond Street  
Toronto, Ontario  
M5B 1W8  
Tel: (416) 864-6060, Ext 77442  
Fax : (416) 864-5485  
e-mail: rayj@smh.ca

**Text word count:** 1789

**Abstract word count:** 246

## Abstract

**Objectives:** Women from the Philippines form one of the largest immigrant groups to North America. Their newborns experience higher rates of preterm birth (PTB), and separately, small-for-gestational age (SGA) birthweight, compared to other East Asians. It is not known if Filipina women are at elevated risk of concomitant PTB and severe SGA (PTB-SGA), a pathological state likely reflective of placental dysfunction and neonatal morbidity.

**Methods:** We conducted a population-based study of all singleton or twin livebirths in Ontario, from 2002 to 2011, among immigrant mothers from the Philippines (N = 27,946), Vietnam (N = 15,297), Hong Kong (N = 5618), South Korea (N = 5148) and China (N = 42,517). We used modified Poisson regression to generate relative risks (RR) of PTB-SGA, defined as a birth < 37 weeks' gestation and a birthweight < 5<sup>th</sup> percentile. RRs were adjusted for maternal age, parity, marital status, income quintile, infant sex and twin births.

**Results:** Relative to mothers from China (2.3 per 1000), the rate of PTB-SGA was significantly higher among infants of mothers from the Philippines (6.5 per 1000; RR 2.91, 95% CI 2.27-3.73), and those from Vietnam (3.7 per 1000; RR 1.68, 95% CI 1.21-2.34). The RR of PTB-SGA was not higher for infants of mothers from Hong Kong or South Korea.

**Interpretation:** Among infants born to immigrant women from five East Asian birthplaces, the risk of PTB-SGA was highest among those from the Philippines. These women and their fetuses may require additional monitoring and interventions.

**Keywords:** Preterm birth; small for gestational age birthweight; ethnicity; race; immigrant; East Asia; Philippines; Filipina; Viet Nam.

**Article summary: Strengths and limitations of this study**

- We conducted a population-based study of all livebirths in Ontario, capturing the entire population of immigrants to Ontario who have birth between 2002 and 2011.
- We accounted for some risk factors for preterm birth (PTB) and small-for-gestational age birthweight (SGA), such as maternal age, infant sex, parity, income level and marital status.
- We lacked data on skillset and level of education at immigration, immigration class, and duration of residence at the time of the index birth.
- We also did not possess information on parental height or weight – which may influence newborn weight.
- We excluded stillbirths, who are potentially the most pathological group of fetuses, and who are at risk of PTB-SGA.



## Background

A pregnancy resulting in a preterm birth (PTB) and concomitant small for gestational age birthweight (SGA) – “PTB-SGA” – is thought to be most pathological, in terms of both being due to placental dysfunction<sup>1 2</sup> and their adverse sequelae for the newborn infant<sup>3 4</sup>. Relative to infants born either PTB alone or SGA alone, those affected by PTB-SGA are 15 times more likely to die in the first month of life<sup>3</sup>.

PTB<sup>5</sup> and SGA<sup>6</sup> are each more frequent in women from the Philippines. Chronic hypertension<sup>7</sup> and preterm onset of preeclampsia<sup>8</sup> are each risk factors for provider-initiated (“iatrogenic”) PTB and SGA, and they are significantly more likely to present in Filipina women than Caucasian or other East Asian women. What remains unknown is whether the risk of PTB-SGA is higher among Filipina women than their counterparts from other East Asian regions.

Herein, we performed a study in Ontario, Canada, where foreign-born individuals comprise 20% of the population and nearly 35% of all births, the highest proportion of G8 countries.<sup>9</sup> We compared the risk of PTB-SGA among five East Asian groups, using a < 5<sup>th</sup> percentile cut-off to define severe SGA, which is more predictive of adverse perinatal outcomes than a < 10<sup>th</sup> percentile cut-off<sup>10</sup>.

## Methods

### *Study sample*

This population-based study comprised all live singletons and twin births in Ontario between 2002 and 2011. Data were retrieved from livebirth records provided by Vital Statistics. We excluded stillbirths, as information on parental place of birth is missing for 12% of records<sup>11</sup>. As all records were de-identified, a given woman may have contributed more than one birth during the study period, but we adjusted for parity, as described below. All pregnancy and newborn care is universally covered under Ontario’s Health Insurance Plan. Approximately 95% of Ontarian women undergo prenatal ultrasonography before 20 weeks gestation, enhancing accuracy of gestational age determined at birth.<sup>12</sup>

### *Exposures and outcomes*

The main exposure was maternal place of birth, which was self-reported on the infant's birth record. Each newborn was then assigned to one of five maternal East Asian birthplaces: (1) China (the referent), (2) Hong Kong, (3) South Korea, (4) Vietnam, and (5) the Philippines. Women from China were chosen as the reference group as they are the largest East Asian immigrant group in Ontario<sup>9</sup>, and are have relatively lower rates of PTB and SGA<sup>5,6</sup>. The main study outcome was PTB-SGA, defined as PTB < 37 weeks and severe SGA < 5<sup>th</sup> percentile<sup>10</sup>. The birthweight percentile curves used herein were those for all livebirths in Ontario, and were not otherwise customized by maternal ethnicity or other factors (6,11). Reasons for the latter were that we restricted our cohort solely to births of East Asian mothers, and that defining severe SGA at < 5<sup>th</sup> percentile is a cut-off that reflects pathological intrauterine growth restriction (10). Secondary outcomes were PTB without severe SGA, and severe SGA without PTB.

### *Data analysis*

We used modified Poisson regression models to estimate relative risks (RR) and 95% confidence intervals (CI) for each study outcome in association with maternal place of birth. RR were adjusted for maternal age (< 20, 20–34, ≥ 35 years), parity (0, 1, 2, 3, ≥ 4), marital status (married/common-law, unmarried, unknown), residential income quintile (Q1 [lowest] to Q5 [highest], unknown)<sup>13</sup>, infant sex, and twin births. The “unknown” categories of marital status and residential income quintile were included in the multivariable models. However, for maternal age and parity, we excluded those pregnancies with “unknown” status, given the rarity of this situation and the need to allow model convergence, accordingly.

For the main outcome of PTB-SGA, we additionally performed stratified analyses to examine potential effect measure modification by parity (nulliparous vs. parous) and by maternal age (< 35 years vs. ≥ 35 years).

As the study focus was to compare immigrants from different East Asian birthplaces, Canadian-born mothers were not included in main regression models. However, for comparative purposes, we described the characteristics of Canadian-born mothers and their

1  
2  
3 infants, and ran an additional analysis of the main model of PTB-SGA with Canadian-born  
4 mothers as the referent.  
5

6  
7 Statistical analyses were performed using SAS 9.4 (SAS Institute Inc., Cary NC). Ethics approval  
8 was provided by the Research Ethics Board of St. Michael's Hospital, Toronto, Ontario.  
9

## 10 11 12 **Results**

13  
14 Between 2002 and 2011, there were 956,994 liveborn singleton or twin births in Ontario to  
15 mothers born in Canada, China, Hong Kong, South Korea, Vietnam or the Philippines. We  
16 excluded 893 infants (0.09%) whose gestational age was < 24 or > 42 weeks, and 487 infants  
17 (0.05%) whose gestational age at birth was unknown. We further excluded infants whose  
18 birthweight was unknown (n = 31) or < 500 g (n = 55), whose sex was unknown (n = 1), or in  
19 which maternal age (n = 108) or parity (n = 239) were unknown.  
20  
21

22 The final cohort comprised 42,517 births to mothers from China, 5,618 from Hong Kong, 5,148  
23 from South Korea, 15,297 from Vietnam, and 27,946 from the Philippines. The remainder were  
24 newborns of mothers from Canada (Table 1). In general, mothers from East Asia tended to be  
25 older than Canadian-born women, but of similar parity. Filipina-born mothers were similar in  
26 age, marital status and income to Chinese-born mothers (Table 1).  
27  
28

29 Compared to mothers from China, the outcomes of PTB without severe SGA, and severe SGA  
30 without PTB, were significantly more prevalent among newborns of mothers from Hong Kong,  
31 Vietnam and the Philippines, but not South Korea (Figure 1). The more severe outcome of PTB-  
32 SGA was significantly more common among newborns of mothers from Vietnam (3.7 per 1000;  
33 aRR 1.68 95% CI 1.21 to 2.34), compared to those of mothers from China (2.3 per 1000) (Figure  
34 1). For newborns of Filipina women, the rate (6.5 per 1000) and aRR (2.91, 95% CI 2.27 to 3.73)  
35 were even higher (Figure 1).  
36  
37

38 In our stratified analyses, the risk of PTB-SGA was somewhat more pronounced among Filipina  
39 women aged  $\geq 35$  years or older (Figure 2, upper) and those who were nulliparous (Figure 2,  
40 lower).  
41  
42

43 Limiting the dataset to singleton births did not appreciably change the RR of PTB-SGA, even  
44 heightening the RR among Filipina women (Supplementary file 1).  
45  
46  
47  
48  
49  
50  
51  
52  
53  
54  
55  
56  
57  
58  
59  
60

1  
2  
3 Re-running the main model of PTB-SGA, with Canadian-born mothers as the referent, showed  
4 that only the offspring of Filipina mothers were at higher risk of PTB-SGA (Supplementary file  
5 2).  
6  
7  
8  
9

## 10 Discussion

11 Newborns of mothers from the Philippines were most vulnerable to PTB-SGA, especially  
12 among women  $\geq 35$  years, who comprised 37% of all Filipina mothers, and in whom the rate of  
13 PTB-SGA was nearly 1%.  
14  
15  
16  
17  
18  
19

### 20 *Strengths and weaknesses*

21 We evaluated nearly 100,000 livebirths among women born in five East Asian regions, which  
22 are major sources of immigrants to Ontario, in a setting of universal healthcare. Infants of  
23 Chinese-born women provided an ideal reference group, as China is the largest source of  
24 immigrants from East Asia to Ontario, and they have a low incidence of adverse neonatal and  
25 maternal outcomes<sup>5, 14</sup>. The  $< 5^{\text{th}}$  percentile cut-off used to define severe SGA reflects a degree  
26 of smallness that is more likely to be pathological, rather than constitutional<sup>10</sup>. Still, the  
27 outcome of PTB-SGA was not rare – occurring in 6.5 per 1000 infants of Filipina mothers.  
28 Through our analysis, we were able to account for some previously noted risk factors for PTB or  
29 SGA, such as maternal age, infant sex, parity, income level and marital status.  
30  
31  
32  
33  
34  
35  
36  
37  
38

39 A limitation of this study was the exclusion of stillbirths, who are potentially the most  
40 pathological group of fetuses, and who are at risk of PTB-SGA<sup>15, 16</sup>. We lacked data on factors  
41 associated with the so-called “healthy immigrant effect”<sup>17</sup>, such as skillset and level of  
42 education at immigration, immigration class, and duration of residence at the time of the index  
43 birth. We also did not possess information on parental height or weight – which may influence  
44 newborn weight – or conditions such as maternal chronic hypertension and diabetes mellitus,  
45 or maternal behavioural risk factors (e.g. smoking, drug or substance use). However, Filipina  
46 women of reproductive age living in Canada have a rate of smoking under 6.0%, comparable to  
47 that of their East Asian counterparts<sup>7</sup>, and the corresponding rate in pregnancy would be  
48 expected to be even lower. The body mass index (BMI) of Filipina women of reproductive age  
49 tends to be higher than that of other East Asians<sup>7</sup>. It is unlikely that access to prenatal care  
50  
51  
52  
53  
54  
55  
56  
57  
58  
59  
60

1  
2  
3 explains the current findings, as 88% of Filipina women and 85% of other East Asian women in  
4 Canada have a regular medical doctor<sup>7</sup>. Finally, we could not identify the specific causes of PTB-  
5 SGA from the dataset used herein, which is certainly worthy of a focused study focused on  
6 differentiating spontaneous vs. provider-initiated PTB. Thus, while our findings represent a  
7 large cohort of immigrants to Canada, they may not be generalizable to other countries with a  
8 large number of first- or second-generation East Asian immigrants.  
9  
10  
11  
12  
13  
14  
15

### 16 *Meaning of the study for clinicians and policy makers*

17  
18 In 2011, 13.1% of all newcomers to Canada were from the Philippines<sup>9</sup>. Women from the  
19 Philippines were at exceptionally high risk of PTB-SGA, peaking at nearly 1% among those aged  
20 35 years and older, and who represent one-third of all Filipina women giving birth in Ontario.  
21 From a public health perspective, there is value in reducing the incidence of PTB-SGA, and such  
22 a strategy might start with Filipina women. For healthcare providers – including family doctors,  
23 obstetricians, or midwives – the priority would be to address risk factors in these women. This  
24 can be done at several time points – before becoming pregnant, during pregnancy, and at the  
25 time of delivery. Before pregnancy, providers can counsel Filipina women, especially those  
26 women older than 35 years of age, on the possibility of adverse perinatal outcomes. During the  
27 pregnancy, risk factors can be identified and managed. Chronic hypertension is one important  
28 risk factor for both PTB<sup>18</sup> and SGA<sup>19 20</sup>, and also for preeclampsia<sup>21</sup>, which can give rise to PTB-  
29 SGA<sup>22</sup>. Chronic hypertension is highly prevalent among Filipina women in Ontario<sup>7</sup>; therefore,  
30 efforts to regulate blood pressure and prevent preeclampsia may help reduce the risk of SGA-  
31 PTB among Filipina women, and also those from Vietnam. Such interventions include aspirin<sup>23-25</sup>  
32 and early pregnancy blood pressure assessments<sup>26</sup>. By the third trimester of pregnancy,  
33 periodic sonographic assessment of fetal growth and well-being should be considered, as there  
34 is evidence that this helps the clinician identify SGA infants and balance the risks of prematurity  
35 against a worsening intrauterine environment<sup>27 28</sup>.  
36  
37  
38  
39  
40  
41  
42  
43  
44  
45  
46  
47  
48  
49  
50  
51  
52  
53  
54  
55  
56  
57  
58  
59  
60

### *Unanswered questions and future research*

What differentiates a Filipina woman from another East Asian woman is her heightened risk of having a liveborn affected by PTB-SGA, a severe pathological state. For Filipina immigrant women, appropriate cautionary measures should be taken to ensure that mother and baby remain healthy throughout the pregnancy and delivery. Future research should aim to identify specific, and ideally modifiable, traits of Filipina women that increase the risk of PTB-SGA during pregnancy. Specifically, it would be worthwhile to evaluate whether the rates of smoking, high BMI, or other socioeconomic indicators differ between pregnant Filipina women and those women from other East Asian birthplaces.

**Authors contributions:** Bartsch contributed to the study concept, analysis and interpretation of the data, drafting of manuscript, manuscript revision and approval of final version. Ray contributed to the study concept, analysis and interpretation of the data, drafting of manuscript, manuscript revision, and approval of final version. Park contributed to the analysis and interpretation of the data, drafting of manuscript, manuscript revision, and approval of final version. Jairam contributed to the interpretation of the data and approval of final version.

**Data sharing statement:** No additional data available.

**Details of ethics approval:** Ethics approval was granted by the Research Ethics Board of St. Michael's Hospital in Toronto, Ontario, Canada.

**Funding statement:** This work was supported by a grant from the Canadian Institutes of Health Research (CIHR). JGR holds a Canadian Institutes for Health Research Chair in Reproductive and Child Health Services and Policy Research, co-funded by the SickKids Foundation.

**Competing interests:** None.

**FIGURE LEGENDS**

Figure 1. Rate and crude (red circles) and adjusted (black squares) relative risk of preterm birth (PTB) without severe small for gestational age (SGA [upper]), SGA without PTB (middle), and PTB with SGA (PTB-SGA [lower]) for liveborn infants of East Asian-born mothers. Relative risks were adjusted for maternal age (< 20, 20–34, ≥ 35 years), parity (0, 1, 2, 3, ≥ 4), marital status (married/common-law, unmarried, unknown), residential income quintile (Q1 [lowest] to Q5 [highest], unknown), infant sex, and twin birth.

Figure 2. Rate and adjusted relative risk of preterm birth (PTB) with severe small for gestational age (SGA) – PTB-SGA – for liveborn infants of East Asian-born mothers, stratified by age (upper two plots) and parity (lower two plots). Relative risks were adjusted for maternal age (< 20, 20–34, ≥ 35 years), parity (0, 1, 2, 3, ≥ 4), marital status (married/common-law, unmarried, unknown), residential income quintile (Q1 [lowest] to Q5 [highest], unknown), infant sex, and twin birth.

## References

1. Salafia CM, Minior VK, Pezzullo JC, et al. Intrauterine growth restriction in infants of less than thirty-two weeks' gestation: associated placental pathologic features. *Am J Obstet Gynecol* 1995;173(4):1049-57.
2. Ananth CV, Vintzileos AM. Ischemic placental disease: Epidemiology and risk factors. *Eur J Obstet Gynecol Reprod Biol* 2011;159(1):77-82.
3. Katz J, Lee AC, Kozuki N, et al. Mortality risk in preterm and small-for-gestational-age infants in low-income and middle-income countries: a pooled country analysis. *Lancet* 2013;382(9890):417-25. doi: 10.1016/s0140-6736(13)60993-9
4. Goldenberg RL, Hauth JC, Andrews WW. Intrauterine infection and preterm delivery. *N Engl J Med* 2000;342(20):1500-7. doi: 10.1056/nejm200005183422007
5. Park AL, Urquia ML, Ray JG. Risk of Preterm Birth According to Maternal and Paternal Country of Birth: A Population-Based Study. *J Obstet Gynaecol Can* 2015;37(12):1053-62.
6. De Souza LR, Urquia ML, Sgro M, et al. One size does not fit all: differences in newborn weight among mothers of Philippine and other East Asian origin. *J Obstet Gynaecol Can* 2012;34(11):1026-37.
7. Fuller-Thomson E, Rotermann M, Ray JG. Elevated risk factors for adverse pregnancy outcomes among Filipina-Canadian women. *J Obstet Gynaecol Can* 2010;32(2):113-9.
8. Ray JG, Wanigaratne S, Park AL, et al. Preterm preeclampsia in relation to country of birth. *J Perinatol* 2016;36(9):718-22. doi: 10.1038/jp.2016.73
9. Immigration and Ethnocultural Diversity in Canada: Statistics Canada; 2013 [Available from: <https://www12.statcan.gc.ca/nhs-enm/2011/as-sa/99-010-x/99-010-x2011001-eng.cfm>], accessed August 3, 2016.
10. Zhang J, Mikolajczyk R, Grewal J, et al. Prenatal application of the individualized fetal growth reference. *Am Journal Epidemiol* 2011;173(5):539-43. doi: 10.1093/aje/kwq411
11. Bartsch E, Park AL, Pulver AJ, et al. Maternal and paternal birthplace and risk of stillbirth. *J Obstet Gynaecol Can* 2015;37(4):314-23.
12. Ray JG, Vermeulen MJ, Schull MJ, et al. Results of the recent immigrant pregnancy and perinatal long-term evaluation study (RIPPLES). *CMAJ* 2007;176(10):1419-26.
13. Wilkins R, Peters PA. Postal code conversion file, PCCF+ version 5K Health Analysis Division: Statistics Canada; 2012 [Available from: <http://www5.statcan.gc.ca/olc-olc/olc.action?ObjId=92-154-X&ObjType=2&lang=en&limit=0>], accessed August 3, 2016.
14. Mukerji G, Chiu M, Shah BR. Gestational diabetes mellitus and pregnancy outcomes among Chinese and South Asian women in Canada. *J Matern Fetal Neonatal Med* 2013;26(3):279-84. doi: 10.3109/14767058.2012.735996
15. Flenady V, Koopmans L, Middleton P, et al. Major risk factors for stillbirth in high-income countries: a systematic review and meta-analysis. *Lancet* 2011;377(9774):1331-40. doi: 10.1016/s0140-6736(10)62233-7
16. Mullan Z, Horton R. Bringing stillbirths out of the shadows. *Lancet* 2011;377(9774):1291-2. doi: 10.1016/s0140-6736(11)60098-6
17. McDonald JT, Kennedy S. Insights into the 'healthy immigrant effect': health status and health service use of immigrants to Canada. *Soc Sci Med* 2004;59(8):1613-27. doi: 10.1016/j.socscimed.2004.02.004



18. Tucker CM, Berrien K, Menard MK, et al. Predicting Preterm Birth Among Women Screened by North Carolina's Pregnancy Medical Home Program. *Matern Child Health J* 2015;19(11):2438-52. doi: 10.1007/s10995-015-1763-5
19. Catov JM, Nohr EA, Olsen J, et al. Chronic hypertension related to risk for preterm and term small for gestational age births. *Obstet Gynecol* 2008;112(2 Pt 1):290-6. doi: 10.1097/AOG.0b013e31817f589b
20. Zetterstrom K, Lindeberg SN, Haglund B, et al. Chronic hypertension as a risk factor for offspring to be born small for gestational age. *Acta Obstetrica et Gynecologica Scandinavica* 2006;85(9):1046-50.
21. Bartsch E, Medcalf KE, Park AL, et al. Clinical risk factors for pre-eclampsia determined in early pregnancy: systematic review and meta-analysis of large cohort studies. *BMJ* 2016;353:i1753. doi: 10.1136/bmj.i1753
22. Sibai B, Dekker G, Kupfermanc M. Pre-eclampsia. *Lancet* 2005;365(9461):785-99. doi: 10.1016/s0140-6736(05)17987-2
23. Lausman A, Kingdom J, Gagnon R, et al. Intrauterine growth restriction: screening, diagnosis, and management. *J Obstet Gynaecol Can* 2013;35(8):741-57.
24. Henderson JT, Whitlock EP, O'Conner E, et al. Low-Dose Aspirin for the Prevention of Morbidity and Mortality From Preeclampsia: A Systematic Evidence Review for the US Preventive Services Task Force. *Rockville (MD): Agency for Healthcare Research and Quality (US)* 2014;Report No.: 14-05207-EF-1.
25. National Collaborating Centre for Women's and Children's Health (UK). Hypertension in Pregnancy: The Management of Hypertensive Disorders During Pregnancy. *National Institute for Health and Clinical Excellence: Guidance. London: RCOG Press* 2010.
26. Kuc S, Koster MP, Franx A, et al. Maternal characteristics, mean arterial pressure and serum markers in early prediction of preeclampsia. *PloS one* 2013;8(5):e63546. doi: 10.1371/journal.pone.0063546
27. Hecher K, Bilardo CM, Stigter RH, et al. Monitoring of fetuses with intrauterine growth restriction: a longitudinal study. *Ultrasound Obstet Gynecol* 2001;18(6):564-70. doi: 10.1046/j.0960-7692.2001.00590.x
28. Nguyen PH, Addo OY, Young M, et al. Patterns of Fetal Growth Based on Ultrasound Measurement and its Relationship with Small for Gestational Age at Birth in Rural Vietnam. *Paediatrics Perinat Epidemiol* 2016;30(3):256-66. doi: 10.1111/ppe.12276

Table 1. Characteristics of live singleton and twin births and their mothers, who delivered at 24 to 42 weeks' gestation in Ontario, 2002 to 2011. All data are presented as a number (%) unless otherwise indicated.

| Characteristic                  | East Asian maternal place of birth |                         |                           |                         |                             | Canadian maternal country of birth<br>(n = 858,654) |
|---------------------------------|------------------------------------|-------------------------|---------------------------|-------------------------|-----------------------------|-----------------------------------------------------|
|                                 | China<br>(n = 42,517)              | Hong Kong<br>(n = 5618) | South Korea<br>(n = 5148) | Vietnam<br>(n = 15,297) | Philippines<br>(n = 27,946) |                                                     |
| <b>Of the mother</b>            |                                    |                         |                           |                         |                             |                                                     |
| Mean (SD) age, years            | 32.3 (4.7)                         | 33.5 (4.3)              | 32.1 (3.9)                | 31.4 (4.8)              | 32.6 (5.4)                  | 29.5 (5.5)                                          |
| Age category, years             |                                    |                         |                           |                         |                             |                                                     |
| < 20                            | 81 (0.2)                           | 17 (0.3)                | 7 (0.1)                   | 68 (0.4)                | 353 (1.3)                   | 38920 (4.5)                                         |
| 20-34                           | 28163 (66.2)                       | 3346 (59.6)             | 3801 (73.8)               | 11178 (73.1)            | 17042 (61.0)                | 662500 (77.2)                                       |
| ≥ 35                            | 14273 (33.6)                       | 2255 (40.1)             | 1340 (26.0)               | 4051 (26.5)             | 10551 (37.8)                | 157234 (18.3)                                       |
| Parity                          | 1 (0-1)                            | 0 (0-1)                 | 1 (0-1)                   | 1 (0-1)                 | 1 (0-1)                     | 1 (0-1)                                             |
| 0                               | 21160 (49.8)                       | 3104 (55.3)             | 2552 (49.6)               | 6809 (44.5)             | 12698 (45.4)                | 389635 (45.4)                                       |
| 1                               | 17836 (42.0)                       | 2023 (36.0)             | 1990 (38.7)               | 5984 (39.1)             | 9905 (35.4)                 | 304847 (35.5)                                       |
| 2                               | 3012 (7.1)                         | 413 (7.4)               | 505 (9.8)                 | 1896 (12.4)             | 3921 (14.0)                 | 111814 (13.0)                                       |
| 3                               | 410 (1.0)                          | 59 (1.1)                | 78 (1.5)                  | 470 (3.1)               | 1047 (3.7)                  | 33591 (3.9)                                         |
| ≥ 4                             | 99 (0.2)                           | 19 (0.3)                | 23 (0.4)                  | 138 (0.9)               | 375 (1.3)                   | 18767 (2.2)                                         |
| Marital status                  |                                    |                         |                           |                         |                             |                                                     |
| Married/common-law              | 36668 (86.2)                       | 5205 (92.6)             | 4829 (93.8)               | 10899 (71.2)            | 22304 (79.8)                | 578402 (67.4)                                       |
| Unmarried                       | 3764 (8.9)                         | 236 (4.2)               | 107 (2.1)                 | 2388 (15.6)             | 3125 (11.2)                 | 132698 (15.5)                                       |
| Unknown                         | 2085 (4.9)                         | 177 (3.2)               | 212 (4.1)                 | 2010 (13.1)             | 2517 (9.0)                  | 147554 (17.2)                                       |
| Residential income quintile (Q) |                                    |                         |                           |                         |                             |                                                     |
| Q1 (lowest)                     | 12391 (29.1)                       | 512 (9.1)               | 1183 (23.0)               | 4091 (26.7)             | 8992 (32.2)                 | 150194 (17.5)                                       |
| Q2                              | 11092 (26.1)                       | 1119 (19.9)             | 976 (19.0)                | 3454 (22.6)             | 6770 (24.2)                 | 159370 (18.6)                                       |
| Q3                              | 7328 (17.2)                        | 1193 (21.2)             | 1021 (19.8)               | 3336 (21.8)             | 5445 (19.5)                 | 177349 (20.7)                                       |
| Q4                              | 6236 (14.7)                        | 1487 (26.5)             | 1021 (19.8)               | 2526 (16.5)             | 4183 (15.0)                 | 192726 (22.4)                                       |
| Q5 (highest)                    | 3971 (9.3)                         | 1148 (20.4)             | 852 (16.6)                | 1387 (9.1)              | 2342 (8.4)                  | 166173 (19.4)                                       |
| Unknown                         | 1499 (3.5)                         | 159 (2.8)               | 95 (1.8)                  | 503 (3.3)               | 214 (0.8)                   | 12842 (1.5)                                         |
| <b>Of the newborn infant</b>    |                                    |                         |                           |                         |                             |                                                     |
| Female sex                      | 20519 (48.3)                       | 2703 (48.1)             | 2444 (47.5)               | 7381 (48.3)             | 13491 (48.3)                | 418726 (48.8)                                       |
| Twin births                     | 901 (2.1)                          | 156 (2.8)               | 105 (2.0)                 | 286 (1.9)               | 554 (2.0)                   | 29075 (3.4)                                         |

SD Standard deviation

Figure 1. Rate and crude (red circles) and adjusted (black squares) relative risk of preterm birth (PTB) without severe small for gestational age (SGA [upper]), SGA without PTB (middle), and PTB with SGA (PTB-SGA [lower]) for liveborn infants of East Asian-born mothers. Relative risks were adjusted for maternal age (< 20, 20–34, ≥ 35 years), parity (0, 1, 2, 3, ≥ 4), marital status (married/common-law, unmarried, unknown), residential income quintile (Q1 [lowest] to Q5 [highest], unknown), infant sex, and twin birth.

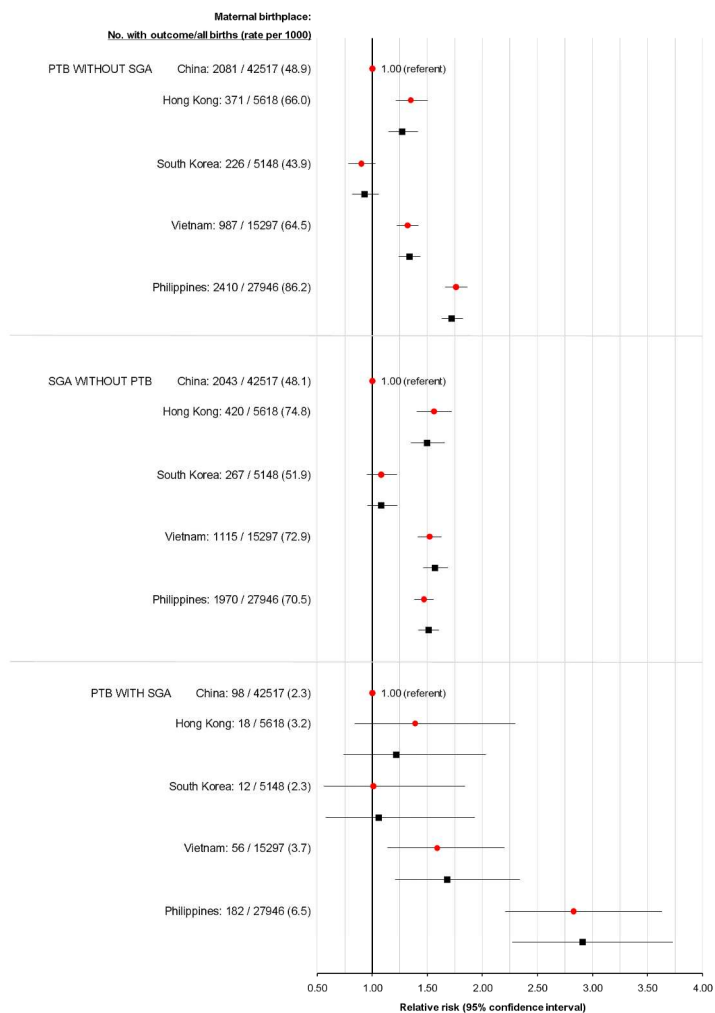

279x361mm (300 x 300 DPI)

1  
2  
3  
4  
5  
6  
7  
8  
9  
10  
11  
12  
13  
14  
15  
16  
17  
18  
19  
20  
21  
22  
23  
24  
25  
26  
27  
28  
29  
30  
31  
32  
33  
34  
35  
36  
37  
38  
39  
40  
41  
42  
43  
44  
45  
46  
47  
48  
49  
50  
51  
52  
53  
54  
55  
56  
57  
58  
59  
60

Figure 2. Rate and adjusted relative risk of preterm birth (PTB) with severe small for gestational age (SGA) – PTB-SGA – for liveborn infants of East Asian-born mothers, stratified by age (upper two plots) and parity (lower two plots). Relative risks were adjusted for maternal age (< 20, 20–34, ≥ 35 years), parity (0, 1, 2, 3, ≥ 4), marital status (married/common-law, unmarried, unknown), residential income quintile (Q1 [lowest] to Q5 [highest], unknown), infant sex, and twin birth.

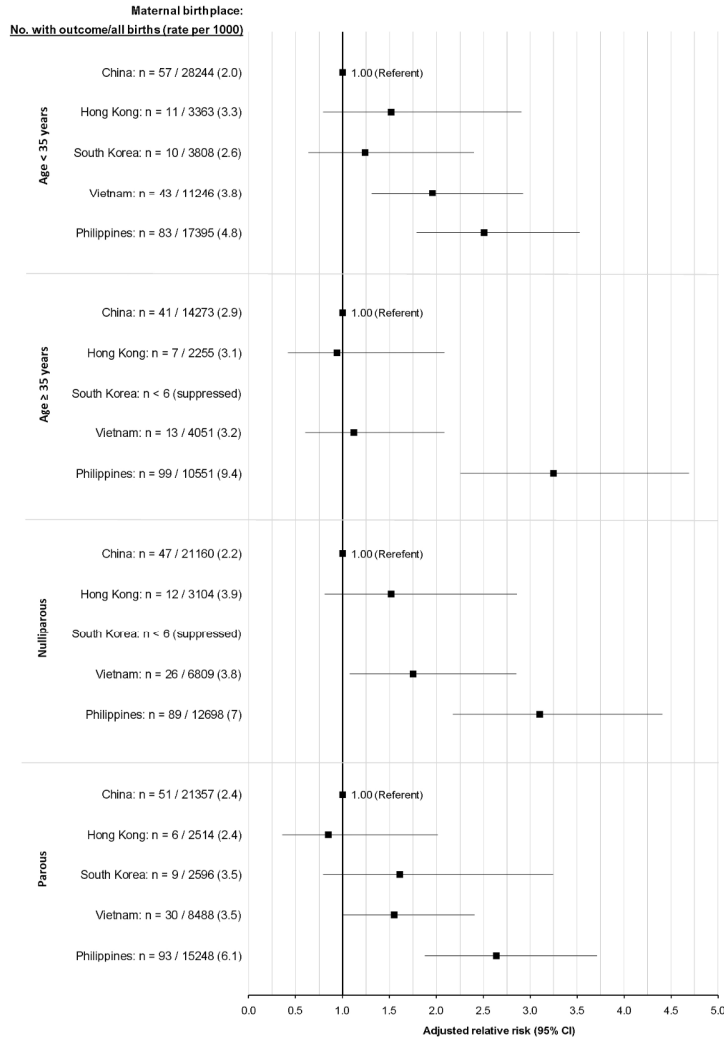

279x361mm (300 x 300 DPI)

Supplementary file 1. Rate and crude (red circles) and adjusted (black squares) relative risk of preterm birth with severe small for gestational age birthweight for liveborn singleton infants of East Asian-born mothers. Relative risks were adjusted for maternal age (< 20, 20–34, ≥ 35 years), parity (0, 1, 2, 3, ≥ 4), marital status (married/common-law, unmarried, unknown), residential income quintile (Q1 [lowest] to Q5 [highest], unknown) and infant sex.



Supplementary file 2. Rate and crude (red circles) and adjusted (black squares) relative risk of preterm birth with severe small for gestational age birthweight for liveborn infants of East Asian-born mothers, each compared to Canadian-born mothers. Relative risks were adjusted for maternal age (< 20, 20–34, ≥ 35 years), parity (0, 1, 2, 3, ≥ 4), marital status (married/common-law, unmarried, unknown), residential income quintile (Q1 [lowest] to Q5 [highest], unknown), infant sex, and twin birth.

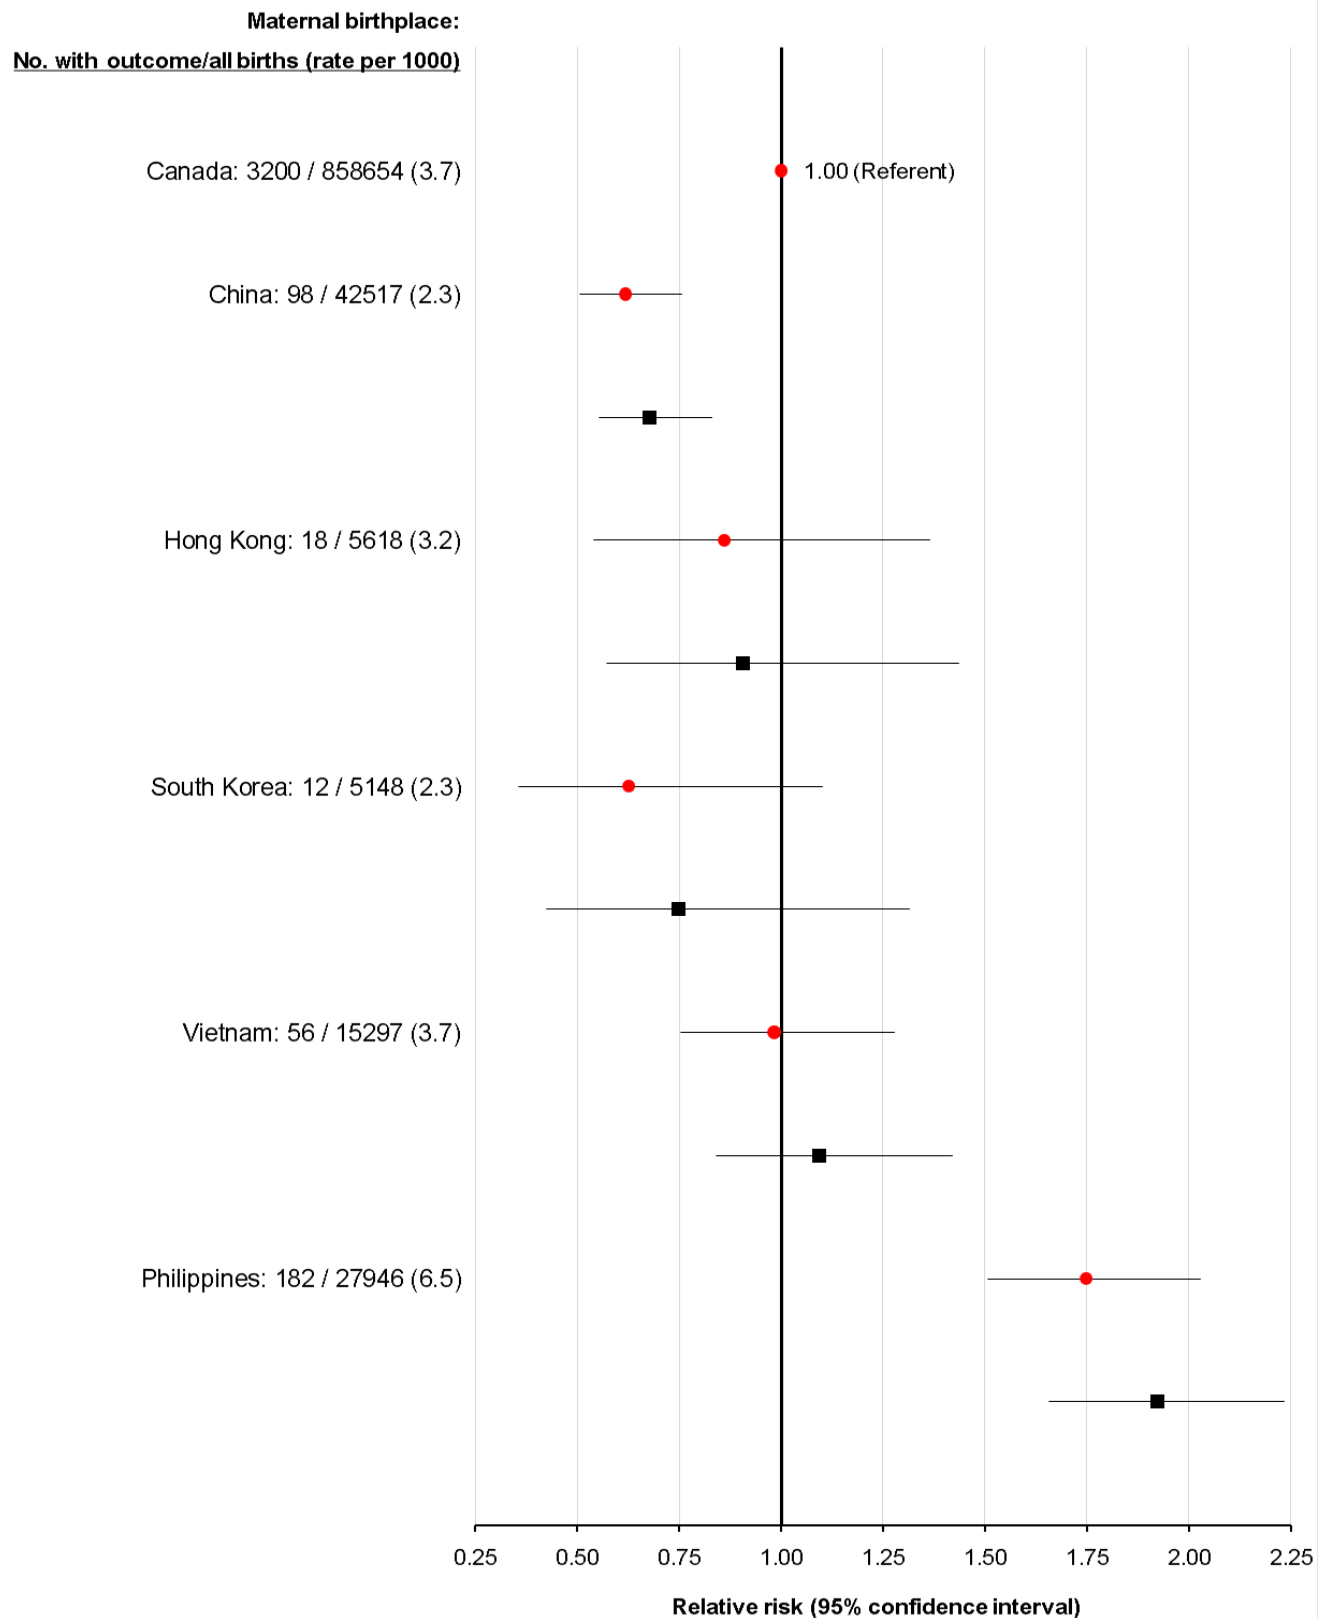

## STROBE Statement

Checklist of items that should be included in reports of observational studies

| Section/Topic            | Item No | Recommendation                                                                                                                                                                             | Reported on Page No |
|--------------------------|---------|--------------------------------------------------------------------------------------------------------------------------------------------------------------------------------------------|---------------------|
| Title and abstract       | 1       | (a) Indicate the study's design with a commonly used term in the title or the abstract                                                                                                     | 2                   |
|                          |         | (b) Provide in the abstract an informative and balanced summary of what was done and what was found                                                                                        | 2                   |
| <b>Introduction</b>      |         |                                                                                                                                                                                            |                     |
| Background/rationale     | 2       | Explain the scientific background and rationale for the investigation being reported                                                                                                       | 3                   |
| Objectives               | 3       | State specific objectives, including any prespecified hypotheses                                                                                                                           | 3                   |
| <b>Methods</b>           |         |                                                                                                                                                                                            |                     |
| Study design             | 4       | Present key elements of study design early in the paper                                                                                                                                    | 3                   |
| Setting                  | 5       | Describe the setting, locations, and relevant dates, including periods of recruitment, exposure, follow-up, and data collection                                                            | 3,4                 |
|                          |         | (a) <i>Cohort study</i> —Give the eligibility criteria, and the sources and methods of selection of participants. Describe methods of follow-up                                            |                     |
| Participants             | 6       | <i>Case-control study</i> —Give the eligibility criteria, and the sources and methods of case ascertainment and control selection. Give the rationale for the choice of cases and controls | 3                   |
|                          |         | <i>Cross-sectional study</i> —Give the eligibility criteria, and the sources and methods of selection of participants                                                                      |                     |
| Variables                | 7       | (b) <i>Cohort study</i> —For matched studies, give matching criteria and number of exposed and unexposed                                                                                   | NA                  |
|                          |         | <i>Case-control study</i> —For matched studies, give matching criteria and the number of controls per case                                                                                 |                     |
|                          |         | Clearly define all outcomes, exposures, predictors, potential confounders, and effect modifiers. Give diagnostic criteria, if applicable                                                   | 4                   |
| Data sources/measurement | 8*      | For each variable of interest, give sources of data and details of methods of assessment (measurement). Describe comparability of assessment methods if there is more than one group       | 4                   |
| Bias                     | 9       | Describe any efforts to address potential sources of bias                                                                                                                                  | 4                   |
| Study size               | 10      | Explain how the study size was arrived at                                                                                                                                                  | 4,5                 |
| Statistical methods      | 11      | Quantitative variables                                                                                                                                                                     | 4                   |
|                          |         | (a) Describe all statistical methods, including those used to control for confounding                                                                                                      | 4                   |
|                          |         | (b) Describe any methods used to examine subgroups and interactions                                                                                                                        | 4                   |
|                          |         | (c) Explain how missing data were addressed                                                                                                                                                | 4,6                 |
|                          |         | (d) <i>Cohort study</i> —If applicable, explain how loss to follow-up was addressed                                                                                                        |                     |
|                          | 12      | <i>Case-control study</i> —If applicable, explain how matching of cases and controls was addressed                                                                                         | 4,6                 |
|                          |         | <i>Cross-sectional study</i> —If applicable, describe analytical methods taking account of sampling strategy                                                                               |                     |
|                          |         | (e) Describe any sensitivity analyses                                                                                                                                                      | 5                   |

| Section/Topic            | Item No | Recommendation                                                                                                                                                                                               | Reported on Page No  |
|--------------------------|---------|--------------------------------------------------------------------------------------------------------------------------------------------------------------------------------------------------------------|----------------------|
| <b>Results</b>           |         |                                                                                                                                                                                                              |                      |
| Participants             | 13*     | (a) Report numbers of individuals at each stage of study—eg numbers potentially eligible, examined for eligibility, confirmed eligible, included in the study, completing follow-up, and analysed            | 5                    |
|                          |         | (b) Give reasons for non-participation at each stage                                                                                                                                                         | 5                    |
|                          |         | (c) Consider use of a flow diagram                                                                                                                                                                           | NA                   |
| Descriptive data         | 14*     | (a) Give characteristics of study participants (eg demographic, clinical, social) and information on exposures and potential confounders                                                                     | Table 1              |
|                          |         | (b) Indicate number of participants with missing data for each variable of interest                                                                                                                          | Table 1              |
|                          |         | (c) <i>Cohort study</i> —Summarise follow-up time (eg, average and total amount)                                                                                                                             |                      |
| Outcome data             | 15*     | <i>Cohort study</i> —Report numbers of outcome events or summary measures over time                                                                                                                          |                      |
|                          |         | <i>Case-control study</i> —Report numbers in each exposure category, or summary measures of exposure                                                                                                         |                      |
|                          |         | <i>Cross-sectional study</i> —Report numbers of outcome events or summary measures                                                                                                                           | 5, Table 1, Figure 1 |
| Main results             | 16      | (a) Give unadjusted estimates and, if applicable, confounder-adjusted estimates and their precision (eg, 95% confidence interval). Make clear which confounders were adjusted for and why they were included | All Figures          |
|                          |         | (b) Report category boundaries when continuous variables were categorized                                                                                                                                    | All Figures          |
|                          |         | (c) If relevant, consider translating estimates of relative risk into absolute risk for a meaningful time period                                                                                             | NA                   |
| Other analyses           | 17      | Report other analyses done—eg analyses of subgroups and interactions, and sensitivity analyses                                                                                                               | 5                    |
| <b>Discussion</b>        |         |                                                                                                                                                                                                              |                      |
| Key results              | 18      | Summarise key results with reference to study objectives                                                                                                                                                     | 5                    |
| Limitations              | 19      | Discuss limitations of the study, taking into account sources of potential bias or imprecision. Discuss both direction and magnitude of any potential bias                                                   | 6                    |
| Interpretation           | 20      | Give a cautious overall interpretation of results considering objectives, limitations, multiplicity of analyses, results from similar studies, and other relevant evidence                                   | 6,7                  |
| Generalisability         | 21      | Discuss the generalisability (external validity) of the study results                                                                                                                                        | 7                    |
| <b>Other Information</b> |         |                                                                                                                                                                                                              |                      |
| Funding                  | 22      | Give the source of funding and the role of the funders for the present study and, if applicable, for the original study on which the present article is based                                                | 7                    |

\*Give information separately for cases and controls in case-control studies and, if applicable, for exposed and unexposed groups in cohort and cross-sectional studies.



**Note:** An Explanation and Elaboration article discusses each checklist item and gives methodological background and published examples of transparent reporting. The STROBE checklist is best used in conjunction with this article (freely available on the Web sites of PLoS Medicine at <http://www.plosmedicine.org/>, Annals of Internal Medicine at <http://www.annals.org/>, and Epidemiology at <http://www.epidem.com/>). Information on the STROBE Initiative is available at [www.strobe-statement.org](http://www.strobe-statement.org).

For peer review only
