# Supplementary material for: Concomitant preterm birth and severe small-for-gestational age birth weight among infants of immigrant mothers in Ontario originating from the Philippines and East Asia: a population-based study
Source: PubMed Central journal article supplement — BMJ Open. 2017 Jul 18;7(7):e015386. doi: 10.1136/bmjopen-2016-015386 (PMC5734583; doi:10.1136/bmjopen-2016-015386), 2017-07-18

**Supplementary file 1. Rate and crude (red circles) and adjusted (black squares) relative risk of preterm birth with severe small for gestational age birthweight for liveborn singleton infants of East Asian-born mothers.** Relative risks were adjusted for maternal age (< 20, 20–34, ≥ 35 years), parity (0, 1, 2, 3, ≥ 4), marital status (married/common-law, unmarried, unknown), residential income quintile (Q1 [lowest] to Q5 [highest], unknown) and infant sex.

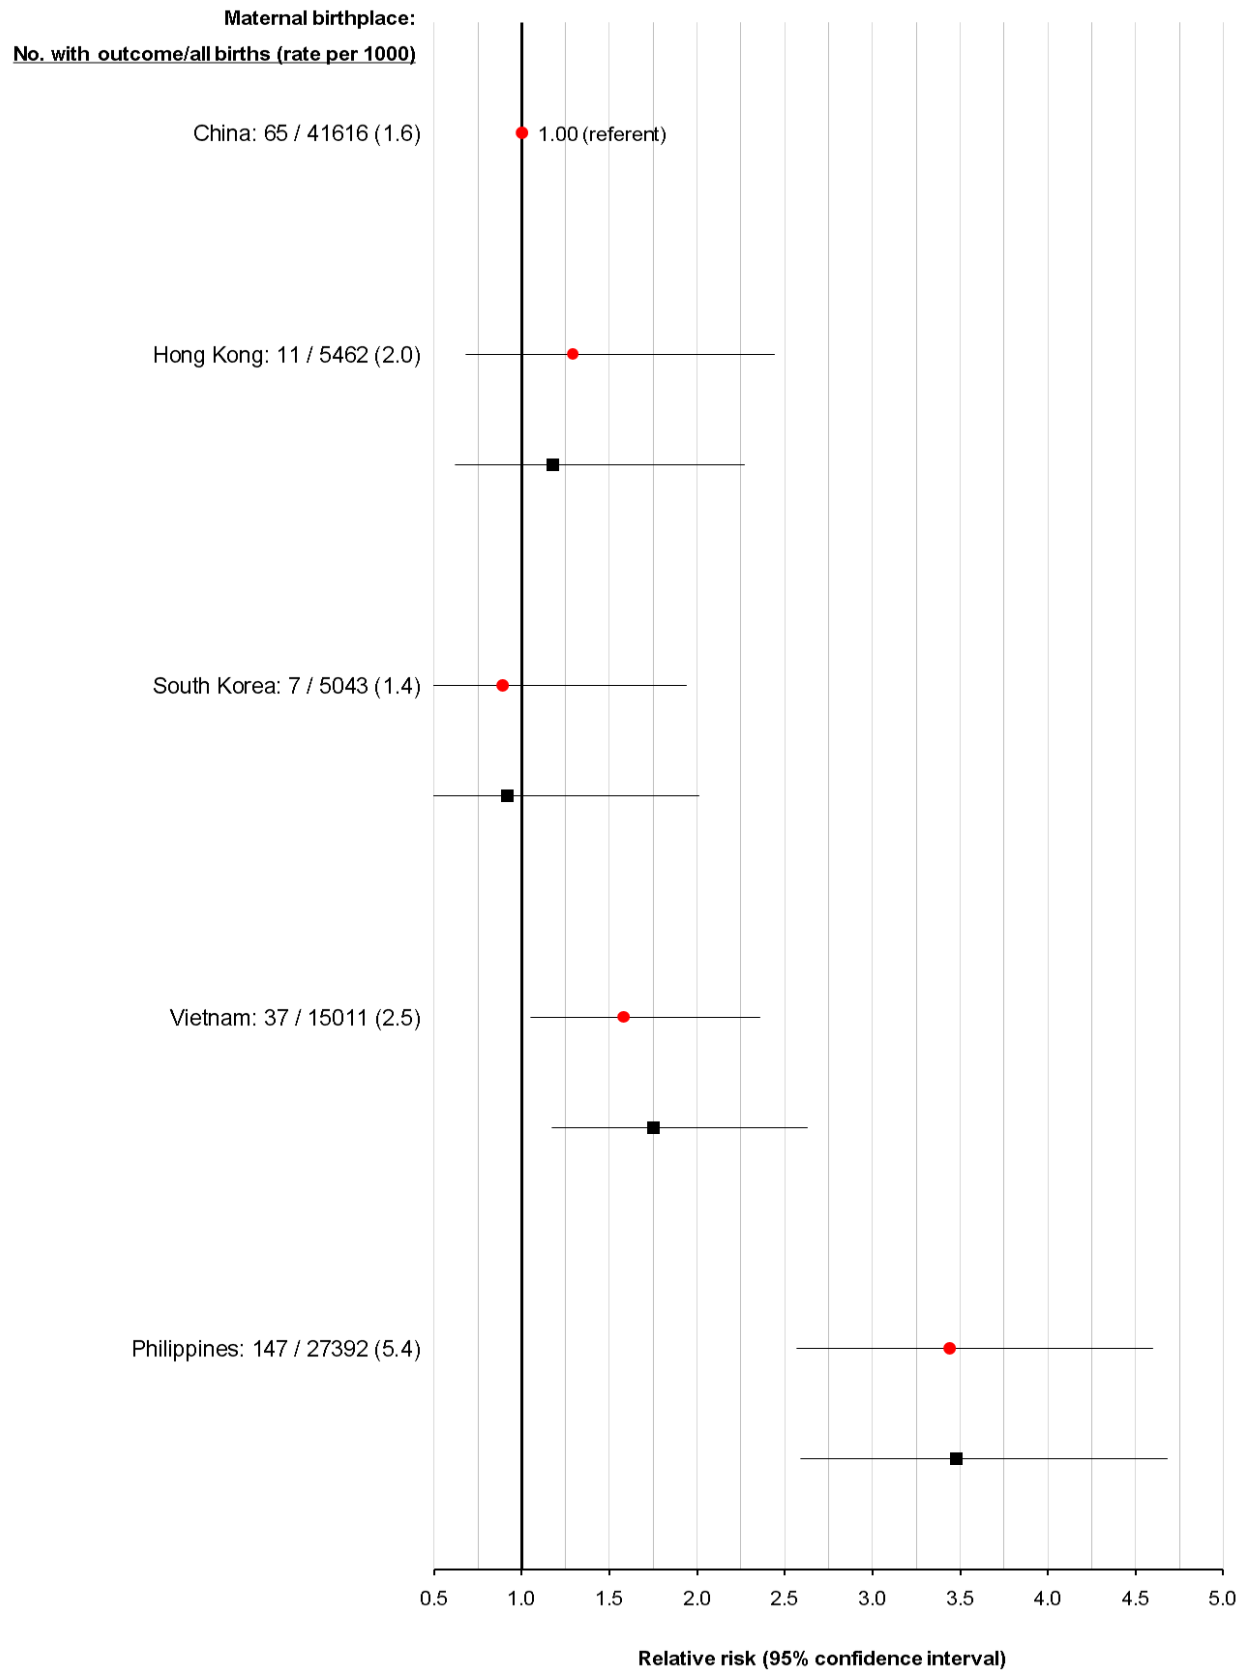

Supplement: bmjopen-2016-015386supp001.pdf [file bmjopen-2016-015386supp001.pdf]
