# Supplementary material for: Concomitant preterm birth and severe small-for-gestational age birth weight among infants of immigrant mothers in Ontario originating from the Philippines and East Asia: a population-based study
Source: PubMed Central journal article supplement — BMJ Open. 2017 Jul 18;7(7):e015386. doi: 10.1136/bmjopen-2016-015386 (PMC5734583; doi:10.1136/bmjopen-2016-015386), 2017-07-18

**Supplementary file 2. Rate and crude (red circles) and adjusted (black squares) relative risk of preterm birth with severe small for gestational age birthweight for liveborn infants of East Asian-born mothers, each compared to Canadian-born mothers.** Relative risks were adjusted for maternal age (< 20, 20–34, ≥ 35 years), parity (0, 1, 2, 3, ≥ 4), marital status (married/common-law, unmarried, unknown), residential income quintile (Q1 [lowest] to Q5 [highest], unknown), infant sex, and twin birth.

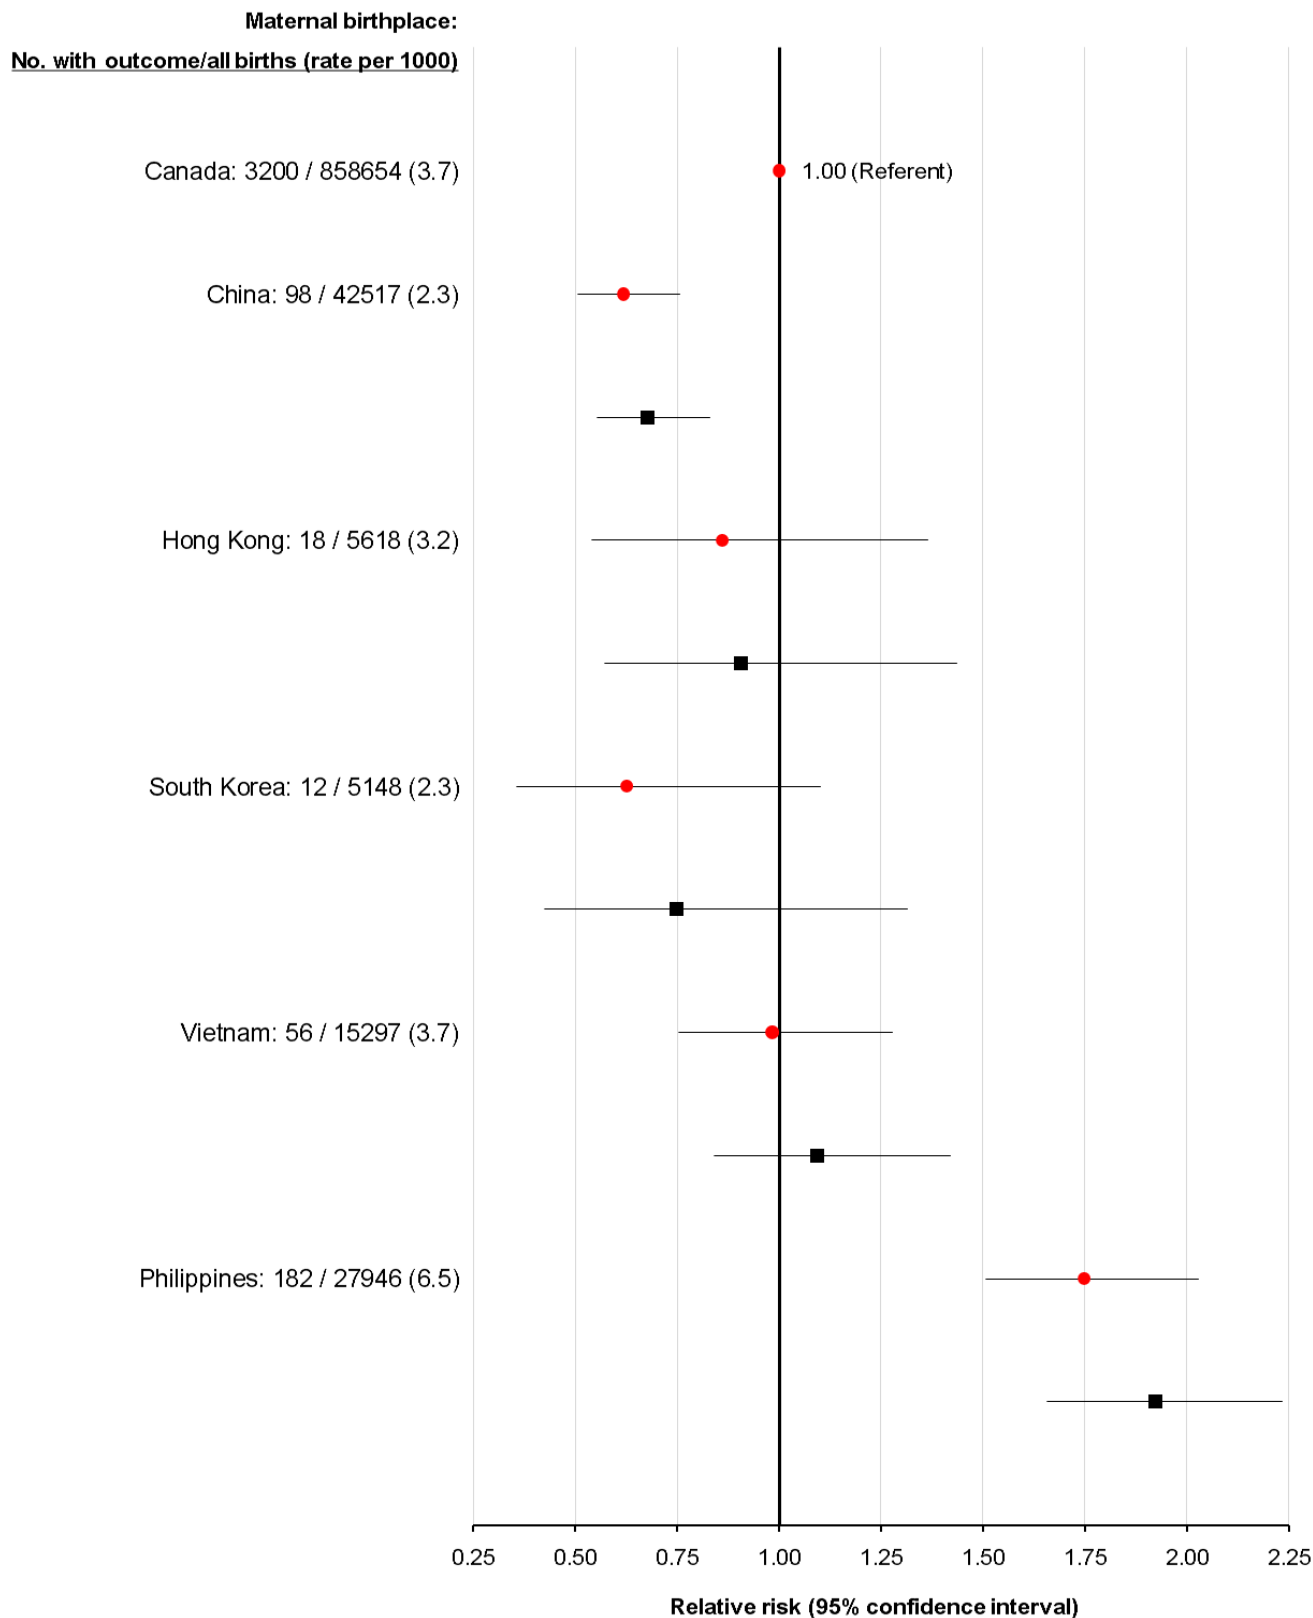

Supplement: bmjopen-2016-015386supp002.pdf [file bmjopen-2016-015386supp002.pdf]
